**Aspartate reduces liver inflammation and fibrosis by suppressing the NLRP3 inflammasome pathway via upregulating NS3TP1 expression**

**Li Zhou<sup>1</sup>, Jing Zhao<sup>2</sup>, Ming Han<sup>2</sup>, Shunai Liu<sup>2</sup>, Xiaoxue Yuan<sup>2</sup>, Anlin Ma<sup>1</sup>, Song Yang<sup>2</sup>, Yilan Zeng<sup>3#</sup>, Jun Cheng<sup>2\*</sup>**

**1 Department of Infectious Disease, China-Japan Friendship Hospital, 100029, Beijing, China;**

**2 Institute of Infectious Diseases, Beijing Ditan Hospital, Capital Medical University, Beijing 100015, China;**

**3 Chengdu Public Health Clinical Medical Center, 377 Jingming Rd, Jinjiang District, Chengdu City, Sichuan Province 610061, China.**

**\* Corresponding authors:**

**Jun Cheng, MD, PhD, EMBA. Institute of Infectious Diseases, Beijing Ditan Hospital, Capital Medical University; NO. 8 East Jingshun St., Chaoyang, Beijing, China, 100015; Telephone 8610 84322006; Fax 8610 84397196; Email: [chengj0817@sina.cn](mailto:chengj0817@sina.cn)**

**# Co-corresponding authors:**

**Yilan Zeng, MD, Chengdu Public Health Clinical Medical Center, 377 Jingming Rd, Jinjiang District, Chengdu City, Sichuan Province 610061, China; [zhyilan991827@163.com](mailto:zhyilan991827@163.com)**

**Running title: Aspartate prevents liver fibrosis**

## Abstract

Aspartate (Asp) can act on liver Kupffer cells, inhibit NOD-like receptor-P 3 (NLRP3) inflammatory bodies, and improve liver inflammation in acute hepatitis. However, the effect of Asp on the role of hepatic stellate cells (HSCs) in the pathogenesis of liver fibrosis in chronic liver injury remains unexplored. This study aimed to investigate the effects of Asp on CCl<sub>4</sub>-induced liver fibrosis in mice and HSCs via the NF- $\kappa$ B/ NLRP3 signaling pathway. Liver fibrosis was induced in C57BL/6J mice by intraperitoneally (IP) injecting 0.5 mL/kg 2% CCl<sub>4</sub> three times weekly for 8 weeks. Asp was administered to mice by gavage once every morning for 4 weeks. Masson's trichrome staining, Sirius red staining and hematoxylin and eosin staining were used to detect and analyze the pathological changes in liver tissues. Western blot analysis and immunohistochemistry were applied to determine the protein expression levels of  $\alpha$ -smooth muscle actin ( $\alpha$ -SMA), collagen III (COL III), NLRP3, and IL-1 $\beta$ . Also, reverse transcription-quantitative PCR was performed to detect the mRNA expression levels. In the liver fibrosis model, the pathological changes in liver tissues improved following treatment with Asp. A marked decrease was observed in protein and mRNA expression levels of  $\alpha$ -SMA, COL III, NLRP3, and IL-1 $\beta$ . In addition, HSCs were treated with Asp. The expression levels of  $\alpha$ -SMA, COL III, NLRP3, and IL-1 $\beta$  reduced in dose- and time-dependent manners. Furthermore, Asp upregulated the expression of NS3TP1 *in vivo* and *in vitro*, and NS3TP1 had a significant inhibitory effect on liver fibrosis. Asp attenuated liver fibrosis and reduced collagen production by suppressing the NF- $\kappa$ B/ NLRP3 signaling pathway via upregulating the expression of NS3TP1.

Keywords: Aspartate, Liver fibrosis, NLRP3, HSC, NS3TP1

## Introduction

Fibrosis is the wound-healing response of tissues to injury of any etiology. Liver fibrosis is a dynamic process characterized by the accumulation of extracellular

matrix (ECM) resulting from the imbalance that favors fibrosis progression (fibrogenesis) over regression (fibrolysis) (1-3). Inflammation is a core element that initiates fibrosis and then leads to progressive fibrosis (4, 5). When injury persists or recurs, fibrosis results in liver cirrhosis-the terminal stage of progressive fibrosis, which is estimated to affect 1%–2% of the global population. Liver cirrhosis is a major cause of morbidity and mortality, resulting in more than 1 million deaths annually worldwide (6). Although many studies have been conducted on liver fibrosis and significant progress has been made, the current treatment options for liver fibrosis are still limited. Hence, further investigation is required.

At the cellular level, hepatic stellate cells (HSCs) are arguably the major source of ECM and play a central role in liver fibrogenesis (7-9). Mechanistically, several key pathways drive HSC activation, except for transforming growth factor-beta (TGF- $\beta$ ) signaling and phosphatidylinositol 3-kinase/ protein kinase B (PI3K/AKT) signaling (1, 3). Recent studies have highlighted the importance of the NOD-like receptor-P (NLRP) inflammasome in liver diseases, including liver fibrosis (10, 11). Further studies showed that the inflammasome regulated liver fibrosis in both direct and indirect manners. To date, NLRP3 is the most fully characterized member of the inflammasome family (12). As a danger signal sensor, NLRP3 is critical for initiating profound sterile inflammatory injury. NLRP3 mediates caspase-1 activation and induces the maturation and secretion of interleukin-1 $\beta$  (IL-1 $\beta$ ) and interleukin-18 (IL-18). Meng's results (13) suggested that NLRP3 inflammasome activation in HSCs might serve as an early mechanism to turn on the inflammatory response and thereby induce liver fibrosis during *Schistosoma* infection. Cai et al. (14) demonstrated that Angiotensin -(1-7) (Ang-(1-7)) improved liver fibrosis by regulating NLRP3 inflammasome activation induced by Ang II-mediated reactive oxygen species (ROS) production via redox balance modulation.

Therefore, the targeting of intra- and intercellular pathways that take part in HSCs activation may serve as an attractive therapeutic strategy to combat progressive fibrotic complications. The central role of the inflammasome in the pathogenesis of

liver diseases makes its inhibition an attractive target for treating these disorders.

Ahmad et al (15) demonstrated that aspartate (Asp), which is one of the nonessential amino acids for mammalian cells, can provide significant hepatoprotection from acute liver injury by downregulating inflammasome NLRP3 activity *in vitro* and *in vivo*.

The inhibition of NLRP3 inflammasome results in a decreased degree of pro-IL-1 and procaspase-1, reducing acute hepatic and pancreatic inflammation. Inflammation is also a common element in the pathogenesis of fibrosis, and liver fibrosis is actually a chronic inflammatory process. These findings made us wonder whether Asp was also associated with NLRP3 inflammasome in HSCs switching on the fibrogenic process.

If so, how Asp regulated NLRP3 inflammasome in liver fibrosis and whether any other mechanisms existed by which Asp regulated liver fibrosis needed investigation.

NS3TP1 (GenBank accession No. AY116969) was first identified by our group in 2004; it is also known as asparagine synthetase domain containing 1 (ASNSD1) (16).

According to the National Center for Biotechnology Information (NCBI) database, the *NS3TP1* gene is 1392 bp long and encodes a 642-amino-acid protein. Our previous studies have shown that NS3TP1 is a target gene trans-activated by the hepatitis C virus nonstructural protein 3 (HCV NS3), using suppression subtractive hybridization (SSH) technique (16, 17). NS3 plays an important role in HCV-induced liver fibrosis (18). Whether NS3TP1 is involved in liver fibrosis is not known. In this study, we also explored the relationship between NS3TP1 and Asp and the role of NS3TP1 in regulating liver fibrosis.

## **Materials and methods**

### **Cell culture**

The human HSC cell line LX-2 cells were purchased from Xiang Ya Central Laboratory (Xiang Ya School of Medicine, China). All cells were maintained in Dulbecco's modified Eagle's medium (DMEM) containing 10% fetal bovine serum (FBS) (Life Technologies, Grand Island, NY, USA), and supplemented with 100 U/mL of penicillin G and 100 µg/mL of streptomycin (SV30010; Thermo Scientific, Rockford, IL, USA) at 37 °C in a humid atmosphere of 5% CO<sub>2</sub>. Human recombinant

TGF- $\beta$ 1 from R&D Systems Inc. (240-B-010/CF; Minneapolis, MN, USA) was added to the supernatant at 5 ng/mL for 24 h.

### **Cell transfection**

Cells were cultured to 60–80% confluence in 6-well plates with 2 mL cell medium, then transiently transfected with pcDNA3.1/myc-His(-)-NS3TP1 plasmid (NS3TP1), or siRNA using jetPRIME (Polyplustransfection, Eastern France) according to the manufacturer's protocol, and the siRNAs were purchased from GenePharma (Shanghai, China).

### **RNA isolation and quantitative Real-Time PCR (Real-Time qPCR)**

Total RNA from transfected LX-2 cells were separately prepared using a Total RNA Kit (R6834; Omega, Georgia, USA) according to the manufacturer's instructions, and analyzed by quantitative PCR using SYBR Green qPCR Master Mix (1206352, Applied Biosystems, Warrington, UK) on an ABI 7500 System (Applied Biosystems, NY, USA). The primers used are listed in Table 1 along with their sequences.

### **Western blotting**

Protein concentrations were determined by the Pierce BCA assay (23225; Thermo Fisher Scientific). An equal amount of protein from cell lysate was loaded into each well of a 10%/12% SDS-polyacrylamide gel after denaturation with SDS loading buffer. After electrophoresis, proteins were transferred to a PVDF membrane, incubated with blocking buffer (5% fat-free milk) for 1 h at room temperature, and blotted with the following antibodies overnight: anti-GAPDH (5174, CST, USA), anti- $\beta$ -actin (sc-47778, Santa Cruz, USA), anti- $\alpha$ -smooth muscle actin ( $\alpha$ -SMA) (BM0002; Boster, Wuhan, China), anti-fibronectin (FN) (sc-9068, Santa Cruz, USA), anti-collagen III (COLIII) (ab7778; Abcam), anti-NLRP3 (D4D8T, CST, USA), anti-IL-1 $\beta$  (ab9722, Abcam), immuno reactive bands were detected using an enhanced chemiluminescence system (32209, Thermo Scientific). Western blot data were quantified using Image J software.

### **Cell proliferation assay**

LX-2 cells were seeded at a density of 5000 cells/well (100  $\mu$ L of DMEM with 10 %

FBS) on a 96-well plate 24 h before addition of Asp. Cell counting kit-8 (CCK-8) solution (EQ645; DOJINDO, Kumamoto, Japan) was added to each well at 24 h, 48 h and 72 h, respectively. The optical density was read at 450 nm according to the manufacturer's instructions.

### **Cell apoptosis assay**

Cells were harvested at 48 h post-treatment with or without Asp. Then cells were washed twice with cold BioLegend cell staining buffer (420201) before resuspension in Annexin V Binding Buffer (422201) at a concentration of  $10^6$  cells/mL. FITC Annexin V and 7-aminoactinomycin D (AAD; 420401) were added successively. DNA content was analyzed using 7-AAD. Flow cytometry was performed using a FACS Calibur (BD Biosciences, USA). Data analysis was performed using FlowJo Version 7.6.1.

### **Animal Studies**

The method to induce liver fibrosis and histological analysis of liver fibrosis were previously described(19). After successful construction of the liver fibrosis mouse model, different concentrations of Asp were administered daily, and after the next 4 weeks, the changes of liver fibrosis in mice were detected. All experiments using mice were conducted in accordance with the Institutional Animal Care and Use Committee of the Institute of Zoology (Chinese Academy of Sciences). Primary hepatic stellate cells were isolated from C57BL/6J mice. Livers were digested using collagenase perfusion in vivo and HSCs were obtained by gradient centrifugation. Cells were plated, and nonadherent cells were removed by washing after 4 h to enrich for HSCs. Incubate adherent cells in supplemented DMEM with 10% FBS, penicillin and streptomycin, before the experiment.

### **Hematoxylin–eosin staining, Masson staining, Sirius red staining, and oil red O staining**

Hematoxylin was purchased from Yili Reagent Company (Beijing, China); Eosin from Zhongshan Golden Bridge Biotechnology Company (Beijing, China); Masson Trichrome Staining Kit from Bogoo Company (Shanghai, China); Picro Sirius Red

Staining Kit from Ruisai Biologicals (Shanghai, China); and Oil Red O solution from Sigma-Aldrich (MO, USA). All the experiments were performed strictly in accordance with the reagent instructions. Staining was assessed by bright-field microscopy and quantified by the Image J software after appropriate thresholding.

### **Immunohistochemistry**

Immunohistochemistry staining was carried out with routine procedures using anti- $\alpha$ -SMA (1:200), anti- COLIII (1:100) and anti- NLRP3 (1:100), anti- IL-1 $\beta$  (1:100) primary antibodies, respectively, overnight at 4°C. After rinsing, the sections were incubated with biotinylated secondary antibodies (ZSGBFBIO, China) for 30 min. Counterstaining was performed with hematoxylin and analyzed under a microscope (OLYMPUS, Japan).

### **RNA-seq and Analysis**

RNA samples were collected from LX-2 cell treated with or without Asp, respectively, and the quality was determined using NanoDrop. Library construction and sequencing were performed on a BGISEQ-500 by Beijing Genomic Institution ([www.genomics.org.cn](http://www.genomics.org.cn), BGI, Shenzhen, China). Clean-tags were mapped to the reference genome and genes available at the Human Genome Annotation Project with a perfect match or one mismatch. For gene expression analysis, the matched reads were calculated and then normalized to RPKM using RESM software. The significance of the differential expression of genes (DEG) was defined by the bioinformatics service of BGI according to the combination of the absolute value of  $\log_2$ -Ratio  $\geq 1$  and FDR  $\leq 0.001$ . KOG functional classification, Gene Ontology (GO) and pathway annotation and enrichment analyses were based on the NCBI COG ([https:// www.ncbi.nlm.nih.gov/COG/](https://www.ncbi.nlm.nih.gov/COG/)), Gene Ontology Database (<http://www.geneontology.org/>) and the Kyoto Encyclopedia of Genes and Genomes (KEGG) pathway database (<http://www.genome.jp/kegg/>), respectively. The software Cluster and Java Treeview were used for hierarchical cluster analysis of gene expression patterns.

### **Statistical analysis.**

To test for significance, a two-tailed *t*-test, nonparametric tests or Chisquare test was used.  $P < 0.05$  was considered a significant difference. If not stated otherwise, data were taken from three to five individual experiments and expressed as means  $\pm$  SE and analyzed with the SPSS 13.0 software (IBM, USA).

## Results

### **Asp supplementation protects against CCl<sub>4</sub>-induced liver fibrosis in mice**

We established an animal model of liver fibrosis to determine whether Asp played a role in regulating liver fibrosis. It is well known that carbon tetrachloride (CCl<sub>4</sub>) - induced liver sustained/ chronic injury is a robust and widely used model in liver fibrosis (20). In a standard CCl<sub>4</sub> mouse model of the liver, C57BL/6J mice develop extensive bridging fibrosis and substantial collagen deposits after 4 weeks of CCl<sub>4</sub> exposure, at a dose of 0.5 ml/kg administered by intraperitoneal (IP) injection three times per week. A stock diet was given with different amounts of Asp or phosphate balanced solution (PBS) to each group using a stomach tube every day for the next 4 weeks (Fig.1A). Although Asp did not significantly alter the serological levels in CCl<sub>4</sub>-induced fibrosis (Fig. 1G), the co-treatment dramatically reduced the expression of histological indicators of fibrosis, such as  $\alpha$ -SMA, COL1A1, COL1A2, and COL3A1, and hence ameliorates liver injury, as assessed by serum alanine aminotransferase (ALT), and Asp transaminase (AST) levels (Fig. 1F). Liver biopsy remains the gold standard to assess the liver fibrosis stage and the necro-inflammatory grade. The histopathological changes in livers were demonstrated by hematoxylin and eosin (H&E) staining, Masson's trichrome staining, and Sirius red staining. CCl<sub>4</sub> IP injection successfully induced liver fibrosis (Fig.1B-E), and Asp-co-treatment almost completely abrogated the fibrogenic response in livers (Fig. 1H-L). The downregulated expression mRNA and protein levels of  $\alpha$ -SMA and COL III confirmed that Asp could decrease liver fibrosis.

### **Inhibitory effect of Asp on HSCs activation *in vitro***

Activation of the HSCs is responsible for the initiation and progression of liver fibrosis (21). We performed *in vitro* studies using LX-2 cells, a well-characterized



human HSC cell line, to better demonstrate this result. First, LX-2 cells were treated with different concentrations of Asp for 24 h. We found that the expression of HSC activation-related genes significantly decreased in a dose-dependent manner (Fig. 2A, C). Next, LX-2 cells were treated with 15 mM Asp for 0, 3, 6, 12, or 24 h. We also observed a similar decrease in  $\alpha$ -SMA, COL III, fibronectin (FN) expression in a time-dependent manner (Fig. 2B, D). Then, we examined whether Asp inhibited TGF- $\beta$ -induced HSCs activation. It was well known TGF- $\beta$ 1 is a classic activator of HSCs and a key mediator in the pathogenesis of liver fibrosis (22). The LX-2 cells were activated by TGF- $\beta$ 1 for 24 h and then treated with Asp (15 mM) for another 24 h. As expected, TGF- $\beta$ 1 promoted the remodeling and deposition of ECM by activating downstream target genes, such as,  $\alpha$ -SMA, COLIII, and FN. This finding revealed that TGF- $\beta$ 1 markedly induced their expression, and Asp inhibited these inductions compared with the control, as shown by the mRNA and protein levels (Fig. 2E, F). These results indicated that Asp promoted TGF- $\beta$ 1-activated HSCs to return to quiescent HSCs (qHSCs).

### **Gene expression profiling using RNA-seq**

RNA-seq was performed to reveal the mechanisms responsible for the aforementioned *in vivo* and *in vitro* observations. LX-2 cells were treated with 15 mM Asp for 24 h. Then RNA samples were collected and RNA-seq assay was performed by Beijing Genomic Institution. The scatter plots of all expressed genes based on the results of each PBS-Asp pair are shown in Fig. 3. A total of 251 genes were screened out from the Asp group compared with the PBS group; of these, 87 genes were upregulated and 164 were downregulated (Fig. 3A, B). Based on the Gene Ontology (GO)-biological process (BP), cellular component (CC) and molecular function (MF), we observed that among the DEGs, the largest group contained genes involved in regulating transcription. The genes involved in the nucleus constituted the second largest group. The third-largest group of genes was involved in growth factor activity (Fig. 3C). Genes usually interact with each other to play roles in certain biological functions. Thus, we performed pathway enrichment analysis of DEGs based on KEGG database.

The inflammation pathway had the largest number of DEGs. The mitogen-activated protein kinase (MAPK) signaling pathway and Toll-like receptor (TOLR) signaling pathway, which were responsible for acute and chronic liver inflammation, were identified as the leading pathways significantly downregulated by Asp compared with PBS (Fig. 3D). In a word, inflammation pathway was identified as the leading downregulated pathway when LX-2 cells treated with Asp. Because of the critical roles of the inflammation pathway in the initiation and progression of liver fibrosis, we focused on the functional roles and related mechanisms of Asp in inhibiting liver fibrosis.

### **Effects of si-NLRP3 on inflammation and liver fibrosis in LX-2 cells**

A previous study showed that Asp supplementation reduced the expression of NLRP3 and  $\beta$ -arrestin-2 (ARRB2), decreased hepatic inflammasome levels, and provided protection against acute inflammatory liver injury (15). More and more studies have identified inflammasome can drive inflammation in liver fibrosis (23). We first validated the role of NLRP3 and ARRB2 on liver fibrosis to further evaluate the role of the inflammasome in hepatic fibroblast activation. First, a small interfering RNA (siRNA) that reduced mRNA and protein expression levels of NLRP3 and ARRB2 was transiently transfected into LX-2 cells. SiRNA oligos interfering were designed by GenePharma. When NLRP3 or ARRB2 was successfully silenced, as detected using real-time qPCR and Western blot, we analyzed the mRNA and protein levels of genes related to inflammation and liver fibrosis, including IL-1 $\beta$ , IL-18, p-NF- $\kappa$ B, COL III, FN, and  $\alpha$ -SMA in LX-2 cells. As shown in Fig. 4A and 4B, all the genes were downregulated when NLRP3 was silenced, implying that NLRP3 had an important impact on liver fibrosis. However, when ARRB2 was silenced, the downregulation of liver fibrosis- and inflammation-related genes was not obvious (Fig. 4C, D). Therefore, NLRP3 is the focus of our follow-up study.

### **Treatment with Asp blocked hepatic NF- $\kappa$ B/NLRP3 expression and attenuated fibrosis *in vitro* and *in vivo***

To clarify the role of NLRP3 in liver fibrosis, we further tested whether Asp had an

effect on gene NLRP3 expression in liver fibrosis. *In vitro*, LX-2 cells were stimulated with lipopolysaccharide (LPS) (1 and 2  $\mu\text{g}/\text{mL}$ ) for 6 h. At the concentration of 1  $\mu\text{g}/\text{mL}$ , the cells obviously had an inflammatory response, and when the concentration increased to 2  $\mu\text{g}/\text{mL}$ , more cells died. Therefore, the optimal concentration of LPS in LX-2 cells was 1  $\mu\text{g}/\text{mL}$  (Fig. 5A). The supernatant was then transferred to LX-2 cells with or without Asp. NLRP3 inflammasome and HSCs were activated by LPS, Asp significantly inhibited LPS-activated NLRP3 inflammasome and HSC activation (Fig. 5B). At the same time, Asp lowered the activation of HSCs in a time- and concentration-dependent manner (Fig. 5C- F). The LX-2 cells were treated with 15.0 mM Asp for 6, 12, 24, or 48 h and then we examined the expression levels of NLRP3 and the key genes involved in inflammation including p-NF- $\kappa\text{B}$  and IL-1 $\beta$ . We found that NLRP3 was abundant in semi-activated LX-2 cells but significantly decreased in LX-2 cells treated with Asp in a dose-dependent manner (Fig. 5D, F). We also observed a similar decrease in NLRP3 expression in a dose-dependent manner when LX-2 cells were treated with different amounts of Asp for 24 h (Fig. 5C, E). Furthermore, Asp blocked NF- $\kappa\text{B}$ /NLRP3 inflammasome signaling pathway activation *in vivo* (Fig. 5G- J). NF- $\kappa\text{B}$  signaling pathways were activated in CCl<sub>4</sub>-induced liver fibrosis, with a significant decrease in Asp-treated mice compared with CCl<sub>4</sub>-treated mice. These results demonstrated that Asp could regulate NF- $\kappa\text{B}$ /NLRP3 inflammasome signaling pathway activation and thereby regulate liver fibrosis.

### **Asp inhibited liver fibrosis by upregulating NS3TP1 expression and then inhibiting the NF- $\kappa\text{B}$ / NLRP3 signaling pathway**

NS3TP1, also known as ASNSD1, is closely related to the metabolism of Asp (16). Previous experiments confirmed that Asp could inhibit liver fibrosis. Therefore, we explored whether NS3TP1 was also associated with liver fibrosis. First, we detected the expression of NS3TP1 in fibrotic liver tissue and activated HSCs. As shown in Fig. 6, the NS3TP1 expression level dramatically decreased in TGF $\beta$ 1-stimulated LX-2 cells and CCl<sub>4</sub>-induced fibrotic disease models (Fig. 6A, B), suggesting some

association between NS3TP1 and liver fibrosis. More importantly, NS3TP1 was down-regulated in LPS-induced inflammatory models but up-regulated after the addition of ASP (Fig. 6C- E). Next, whether NA3TP1 regulated liver fibrosis and liver inflammation were investigated. pcDNA3.1/myc-His-NS3TP1 (NS3TP1) and NS3TP1 siRNA (si-NS3TP1) were transfected into LX-2 cells, respectively, with respective negative controls. As the presently available NS3TP1 antibody did not work well, only qRT-PCR confirmed that NS3TP1 was successfully overexpressed or silenced in LX-2 cells (Fig. 6F, G). Notably, the levels of  $\alpha$ -SMA, FN, COL III, NLRP3, and IL-1 $\beta$  significantly decreased after NS3TP1 overexpression and strikingly increased after NS3TP1 knockdown compared with the control group (Fig. 6F-I). Taken together, these results demonstrated that NS3TP1 suppressed HSC inflammation and ECM production *in vitro*.

#### **Asp supplementation suppressed HSC proliferation and activation and promoted apoptosis *in vitro***

HSCs play a major role in liver fibrosis. They primarily store vitamin A in a quiescent or normal state. After activation, HSCs become proliferative and lose their typical star shape to be in a myofibroblast-like phenotype (MF-HSC) (1, 22). After confirming the inhibitory role of Asp in liver fibrosis, we further tested whether Asp inhibited liver fibrosis also via regulating the differentiation, activation, and proliferation of HSCs. First, we examined the effect of Asp on the growth of HSCs using CCK-8 assay. The treatment of LX-2 cells and primary HSCs with 15 mM Asp significantly inhibited cellular proliferation compared with control cells after supplementation for 12, 24, 36, 48 or 72 h (Fig. 7A, B). The results showed that Asp markedly blocked the proliferation of HSCs. Second, the cell apoptosis was analyzed using flow cytometry. The total number of Annexin V–positive LX-2 cells and primary HSCs increased after adding 15 mM Asp compared with the control group treated with PBS, implying that Asp promoted cell apoptosis (Fig. 7C, D). Next, we used an oil red O staining test to detect the lipid storage status of HSCs. Oil red O staining results in LX-2 cells and primary HSCs indicated that lipid droplet accumulation increased in cells treated with

Asp compared with negative controls (Fig. 7E, F). In a word, Asp not only dramatically reduced the level of proliferation, but also induced apoptosis and significantly increased the lipid content close to the level in quiescent cells.

### **D-Asp had effects similar to those of L-Asp**

Although aspartic acid exists in L-form, we also tested the effect of D-forms on liver fibrosis. LX-2 cells were treated with different concentrations of D- Asp for 24 h, or treated with 15.0 mM D-Asp for different time. D-Asp significantly lowered the levels of COL III, p-NF- $\kappa$ B, NLRP3, and IL-1 $\beta$  in dose- and time-dependent manners (Fig. 8A, B), which were genes related to ECM deposition and inflammation. These results showed that Asp could regulate NF- $\kappa$ B/NLRP3 inflammasome signaling pathway activation, thereby inhibiting liver fibrosis.

### **Discussion**

Fibrosis is a complicated disease, characterized by the sustained activation of quiescent HSCs and eventually progresses to liver failure and serves as the major cause of hepatocellular carcinoma (2, 21). Although a growing number of small molecules and biologics have been identified and are under clinical trials for one or more fibrotic diseases, only a limited number of therapeutic options are available for liver fibrosis currently (24). This study demonstrated the inhibitory effects of Asp on fibrogenesis in HSCs and mice with liver fibrosis. Asp was found to antagonize liver fibrosis by inhibiting HSC proliferation and activation and boosting cell apoptosis, and to block the NF- $\kappa$ B/NLRP3 inflammasome signaling pathway in HSCs. We used two models to determine its effects, (1) an *in vivo* mouse model of liver fibrosis induced by the long-term injection of CCl<sub>4</sub>, and (2) an *in vitro* model based on LX-2 cells treated with or without TGF- $\beta$ 1 or LPS.

The present experiments employed CCl<sub>4</sub> -treated mice, a liver fibrosis model, which is nonlethal and has milder features than the DMN model, and bile duct ligation models(20). In this clinically relevant model, CCl<sub>4</sub> treatment for 4 weeks induced liver fibrosis, as indicated by serum parameters of hepatocyte damage (ALT and AST levels) and histological indicators, whereas the concomitant administration of Asp

significantly inhibited hepatocyte damage. Moreover, it could inhibit HSC activation and ECM aggregation of CCl<sub>4</sub>-induced fibrosis. Our data failed to support a suggestive role of HN, LN, and collagen of type III/ IV in serum contributing to liver fibrosis. Our present results in CCl<sub>4</sub> -treated mice demonstrated that Asp, an orally available small molecule, afforded substantial (though incomplete) protection against hepatic fibrosis when administered at the same time when the disease was induced for 4 weeks. Moderate (albeit not significant) reduction of collagen deposition occurred. The accumulation of ECM is the main marker of liver fibrosis, and the activation of HSCs is a prerequisite of this phenomenon (21, 25). In the normal liver, HSCs are not fibrogenic and store vitamin A. However, repeat injury stimulates inflammatory processes, such as the production of toxic cytokines and the recruitment of inflammatory cells. During these processes, HSCs are activated and have fibrogenic characteristics, indicating their transition to myofibroblasts (26). In the present study, the oral administration of Asp to mice blocked CCl<sub>4</sub>-induced collagen deposition, as assessed by immunohistochemistry with Sirius red, Masson and COL III stainings (Fig. 1K, L). Furthermore, Asp inhibited the protein expression of  $\alpha$ -SMA in partially activated LX-2 cells. TGF- $\beta$  is the most important fibrogenic stimulator (27). Increased levels of TGF- $\beta$  have been reported in animals and humans with liver fibrosis, and activated HSCs represent a major cellular source of TGF- $\beta$  in the injured liver (1). Asp supplementation abrogated the TGF- $\beta$ 1-induced increase in  $\alpha$ -SMA and collagen production, implying that Asp inhibited HSC transformation into myofibroblasts.

The activation of cytologic inflammasome machinery is responsible for acute and chronic liver inflammation (28, 29). A previous study showed that Asp supplementation reduced hepatic inflammasome levels and provided protection against acute inflammatory liver injury (15). This study demonstrated for the first time that Asp could inhibit chronic inflammatory liver injury. Some studies showed that NLRP3 inflammasome resulted in liver inflammation and fibrosis (30). A recent report showed that myeloid-specific NLRP3 activation caused severe liver

inflammation and HSC activation with collagen deposition in the liver (12, 31). Our previous studies found that tenofovir alafenamide fumarate (TAF) and tenofovir disoproxil fumarate (TDF) protected liver injury by decreasing NF- $\kappa$ B/NLRP3 inflammasome signaling pathways, thereby attenuating liver fibrosis (30). Therefore, the NLRP3 inflammasome pathway is a promising therapeutic target for preventing and treating liver fibrosis. The present study demonstrated the importance of NF- $\kappa$ B/NLRP3 inflammasome in liver fibrosis by silencing the expression of NLRP3. Then, we focused on the effects of Asp on HSC fibrogenesis and activation through the NF- $\kappa$ B/NLRP3 inflammasome pathway. Gene expression was detected using RNA-seq in LX-2 cells treated with or without Asp. As showed in Fig. 3, the inflammation pathway was identified as the leading downregulated pathway when LX-2 cells were treated with Asp. More importantly, the downregulation of NLRP3 attenuated HSC activation and liver fibrosis, suggesting that the upregulation of NLRP3 was an intrinsic response of HSC and was necessary for HSC activation. NF- $\kappa$ B is an essential transcriptional regulator of inflammatory signaling and cell death during liver fibrosis development (32). Furthermore, we showed that the NF- $\kappa$ B/NLRP3 inflammasome pathway was activated in LPS-induced LX-2 cells and CCl<sub>4</sub>-treated mice with liver fibrosis. Asp blocked the activation of the NLRP3 inflammasome, with the resultant suppression of ECM aggregation. Together, these data provided compelling evidence to support previous findings that Asp supplementation reduced hepatic inflammasome.

Termination of chronic liver injury results in the regression of liver fibrosis accompanied by a resolution of cytokine-rich inflammatory tissue microenvironment as well as the reduction or loss of activated HSCs. In our study, Asp attenuated not only HSC activation but also proliferation and apoptosis (Fig. 7), which is considered an important mechanism of the persistent activation of HSCs. We hypothesized that Asp might affect cell cycle progression decreasing cell proliferation and promoting apoptosis. This possibility should be investigated further in future studies.

Asparagine synthase (ASNS) plays a major role in catalyzing the conversion of Asp and glutamine into asparagine and glutamate in ATP-dependent reactions. NS3TP1, also known as ASNSD1, is an understudied ASNS, which is upregulated by HCV NS3. NS3 protein plays an important role in HCV-induced liver fibrosis. We further explored the role of NS3TP1 in liver fibrosis and whether it was linked to the inhibitory role of Asp on liver fibrosis. Interestingly, the mRNA level of NS3TP1 was downregulated in TGF- $\beta$ 1- or LPS-treated cells and CCl<sub>4</sub>-treated mice, but upregulated after the addition of Asp, providing a clue to the role of NS3TP1 in liver fibrosis. Also, our results showed that NS3TP1 overexpression significantly decreased the basal expression of the marker of HSC activation ( $\alpha$ -SMA), collagen synthesis, and NLRP3 inflammasome at both mRNA and protein levels in LX-2 cells. Conversely, NS3TP1 silencing dramatically increased the expression of these genes. We hypothesized that NS3TP1 interfered with liver fibrosis by targeting the NF- $\kappa$ B/NLRP3 inflammasome pathway. However, how NS3TP1 participates in regulating the biological effects mediated by the NF- $\kappa$ B/NLRP3 inflammasome signaling pathway and the mechanism of Asp regulating NS3TP1 are not clearly understood, needing further investigation. In addition, whether these results and conclusions are applicable *in vivo* needs further verification. Although D-isomers of amino acids are rare in vertebrates, we confirmed that the D-isomer of Asp could downregulate inflammasome activity. *In vivo* and *in vitro* studies strongly confirmed the inhibitory effect of Asp on liver fibrosis. However, aspartic acid is less soluble. With the accelerated pace of drug development, whether similar small molecules with better solubility can be developed is worth exploring. In fact, we are already doing this work and have achieved the desired results. This study also elaborated on the relationship between inflammation and fibrosis, revealing potential novel therapeutic approaches, which might serve as attractive research strategies to identify anti-fibrotic compounds. Furthermore, Asp may also play an important role in fibrosis in other organs because the core pathway of fibrosis is shared among other organs including the lungs and kidneys (33, 34).



In conclusion, our study largely expanded the biological functions of Asp in HSC activation, proliferation, and apoptosis. This further suggested that the Asp inhibited NF- $\kappa$ B/NLRP3 signaling pathway by upregulating the expression of NS3TP1, which might be the mechanism by which Asp regulated liver fibrosis, at least in part.

### **Declaration of conflicting interests**

The author(s) declared no potential conflicts of interest with respect to the research, authorship, and/or publication of this article.

### **Funding**

This work was supported by grants from the National Key R&D Program of China (2020YFC2004803) and the National Natural Science Foundation of China (no. 81470863).

## **References**

1. Friedman, S.L. 2008. Mechanisms of hepatic fibrogenesis. *Gastroenterology*. 2008. **134**: 1655-69.
2. Thompson, A.J. and Patel, K. 2010. Antifibrotic therapies: will we ever get there. *Curr Gastroenterol Rep*. 2010. **12**: 23-9.
3. Novo, E. and Parola, M. 2012. The role of redox mechanisms in hepatic chronic wound healing and fibrogenesis. *Fibrogenesis Tissue Repair*. 2012. **5**: S4.
4. Friedman, S.L., Sheppard, D., Duffield, J.S. and Violette, S. 2013. Therapy for fibrotic diseases: nearing the starting line. *Sci Transl Med*. 2013. **5**: 167sr1.
5. Liu, Y., et al. 2021. Tumor Necrosis Factor  $\alpha$ -Induced Protein 8-Like 2 Alleviates Nonalcoholic Fatty Liver Disease Through Suppressing Transforming Growth Factor Beta-Activated Kinase 1 Activation. *Hepatology*. 2021. **74**: 1300-1318.
6. Lee, Y.A., Wallace, M.C. and Friedman, S.L. 2015. Pathobiology of liver fibrosis: a translational success story. *Gut*. 2015. **64**: 830-41.
7. Wang, S.S., et al. 2021. Perivenous Stellate Cells Are the Main Source of Myofibroblasts and Cancer-Associated Fibroblasts Formed After Chronic Liver Injuries. *Hepatology*. 2021. **74**: 1578-1594.
8. Schuppan, D. and Kim, Y.O. 2013. Evolving therapies for liver fibrosis. *J Clin Invest*. 2013. **123**: 1887-901.
9. Li, H., You, H., Fan, X. and Jia, J. 2016. Hepatic macrophages in liver fibrosis: pathogenesis and potential therapeutic targets. *BMJ Open Gastroenterol*. 2016. **3**: e000079.
10. Wree, A., et al. 2018. NLRP3 inflammasome driven liver injury and fibrosis: Roles of IL-17 and TNF in mice. *Hepatology*. 2018. **67**: 736-749.
11. Alegre, F., et al. 2022. Macrophages Modulate Hepatic Injury Involving NLRP3 Inflammasome: The Example of Efavirenz. *Biomedicines*. 2022. **10** .

12. Calcagno, D.M., et al. 2022. NOD-like receptor protein 3 activation causes spontaneous inflammation and fibrosis that mimics human NASH. *Hepatology*. 2022 .
13. Meng, N., et al. 2016. Activation of NLRP3 inflammasomes in mouse hepatic stellate cells during *Schistosoma J.* infection. *Oncotarget*. 2016. **7**: 39316-39331.
14. Cai, S.M., et al. 2016. Angiotensin-(1-7) Improves Liver Fibrosis by Regulating the NLRP3 Inflammasome via Redox Balance Modulation. *Antioxid Redox Signal*. 2016. **24**: 795-812.
15. Ahmad, F., et al. Activation of N-methyl-d-aspartate receptor downregulates inflammasome activity and liver inflammation via a  $\beta$ -arrestin-2 pathway. *American journal of physiology. Gastrointestinal and liver physiology* 2014. **307**: 107.
16. Dong Ji, J.C., Jianjun Wang, Y.L., Yang Qian, X.D. and Wang, C. 2004. Screening and cloning of the target genes transactivated by human gene 1 transactivated by hepatitis C virus NS3 protein using suppression subtractive hybridization. *World Journal of Chinese Digestion*. 2004 : 93-96.
17. Dong Ji, J.C., Yan Liu, J.W. and Guo, J. 2004. Screening of differentially expressed genes in NS3TP1-transfected cells by gene expression profiling chip technology. *World Journal of Chinese Digestion*. 2004 : 201-205.
18. Bansal, R., et al. 2015. Hepatitis C Virus Nonstructural 3/4A Protein Dampens Inflammation and Contributes to Slow Fibrosis Progression during Chronic Fibrosis In Vivo. *PLoS One*. 2015. **10**: e0128466.
19. Zhou, L., et al. 2018. miR-185 Inhibits Fibrogenic Activation of Hepatic Stellate Cells and Prevents Liver Fibrosis. *Mol Ther Nucleic Acids*. 2018. **10**: 91-102.
20. Domenicali, M., et al. 2009. A novel model of CCl4-induced cirrhosis with ascites in the mouse. *J Hepatol*. 2009. **51**: 991-9.
21. Friedman, S.L. 2008. Hepatic stellate cells: protean, multifunctional, and enigmatic cells of the liver. *Physiol Rev*. 2008. **88**: 125-72.
22. Kisseleva, T. and Brenner, D.A. 2007. Role of hepatic stellate cells in fibrogenesis and the reversal of fibrosis. *J Gastroenterol Hepatol*. 2007. **22 Suppl 1**: S73-8.
23. Del Campo, J.A., Gallego, P. and Grande, L. 2018. Role of inflammatory response in liver diseases: Therapeutic strategies. *World J Hepatol*. 2018. **10**: 1-7.
24. Tan, Z., et al. 2021. Liver Fibrosis: Therapeutic Targets and Advances in Drug Therapy. *Front Cell Dev Biol*. 2021. **9**: 730176.
25. Higashi, T., Friedman, S.L. and Hoshida, Y. 2017. Hepatic stellate cells as key target in liver fibrosis. *Adv Drug Deliv Rev*. 2017. **121**: 27-42.
26. Pinzani, M. and Marra, F. 2001. Cytokine receptors and signaling in hepatic stellate cells. *Semin Liver Dis*. 2001. **21**: 397-416.
27. Massagué, J. 2000. How cells read TGF-beta signals. *Nat Rev Mol Cell Biol*. 2000. **1**: 169-78.
28. Gallego, P., Castejón-Vega, B., Del Campo, J.A. and Cordero, M.D. 2020. The Absence of NLRP3-inflammasome Modulates Hepatic Fibrosis Progression, Lipid Metabolism, and Inflammation in KO NLRP3 Mice during Aging. *Cells*. 2020. **9** .
29. Szabo, G. and Petrasek, J. 2015. Inflammasome activation and function in liver disease. *Nat Rev Gastroenterol Hepatol*. 2015. **12**: 387-400.
30. Jing, Z., et al. 2019. TAF and TDF attenuate liver fibrosis through NS5ATP9, TGF $\beta$ 1\_Smad3, and NF- $\kappa$ B\_NLRP3 inflammasome signaling pathways. *Hepatol Int*. 2019. **14** .
31. Wree, A., et al. 2014. NLRP3 inflammasome activation results in hepatocyte pyroptosis, liver inflammation, and fibrosis in mice. *Hepatology*. 2014. **59**: 898-910.

32. Engel, M.E., McDonnell, M.A., Law, B.K. and Moses, H.L. 1999. Interdependent SMAD and JNK signaling in transforming growth factor-beta-mediated transcription. *J Biol Chem.* 1999. **274**: 37413-20.
33. Mehal, W.Z., Iredale, J. and Friedman, S.L. 2011. Scraping fibrosis: expressway to the core of fibrosis. *Nat Med.* 2011. **17**: 552-3.
34. Schnittert, J., Bansal, R., Storm, G. and Prakash, J. 2018. Integrins in wound healing, fibrosis and tumor stroma: High potential targets for therapeutics and drug delivery. *Adv Drug Deliv Rev.* 2018. **129**: 37-53.

**Table 1. Primers Used for Real-Time Polymerase Chain Reaction (PCR)**

| GENES          | SPECIES | SENSE (5'-3')            | ANTISENSE (5'-3')      |
|----------------|---------|--------------------------|------------------------|
| $\beta$ -actin | Hum     | CATCCGCAAAGAC CTG TAC GC | AGTACTTGCGCTCAGGAGGAG  |
| $\alpha$ -SMA  | Hum     | GGGAATGGGACAAAAGACA      | CTTCAGGGGCAACACGAA     |
| COLL1A1        | Hum     | GGGATTCCTGGACCTAAAG      | GGAACACCTCGCTCTCCA     |
| COLL1A2        | Hum     | CTGGAGAGGCTGGTACTGCT     | AGCACCAAGAAGACCCTGAG   |
| COLL3A1        | Hum     | CTGGACCCAGGGTCTTC        | GACCATCTGATCCAGGGTTTC  |
| ARRB2          | Hum     | GGAAACTCAAGCACGAGGAC     | CTTGTTGGCACCCTCCTTC    |
| NLRP3          | Hum     | CACCTGTTGTGCAATCTGAAG    | GCAAGATCCTGACAACATGC   |
| IL-1 $\beta$   | Hum     | TCGCCAGTGAAATGATGGCT     | TGGAAGGAGCACTTCATCTGT  |
| $\beta$ -actin | Mus     | CTAAGGCCAACCGTGAAAAG     | ACCAGAGGCATACAGGGACA   |
| COLL1A1        | Mus     | TTCTCCTGGCAAAGACGGAC     | CGGCCACCATCTTGAGACTT   |
| COLL1A2        | Mus     | TAGCCAACCGTGCTTCTCAG     | TCTCCTCATCCAGGTACGCA   |
| COLL3A1        | Mus     | AAGGCTGCAAGATGGATGCT     | GTGCTTACGTGGGACAGTCA   |
| $\alpha$ -SMA  | Mus     | GAGACTCTCTCCAGCCATCTT    | TGATCTCCTTCTGCATCCTGTC |
| IL-6           | Mus     | AGACAAAGCCAGAGTCCTTCAG   | GCCACTCCTTCTGTGACTCCAG |
| NLRP3          | Mus     | CCACATCTGATTGTGTTAATGGCT | GGGCTTAGGTCCACACAGAA   |
| IL-1 $\beta$   | Mus     | GCCACCTTTTGACAGTGATGAG   | GACAGCCCAGGTCAAAGGTT   |

## Fig. legend

### Fig. 1 Asp supplementation protects against CCl<sub>4</sub>-induced liver fibrosis in mice

(A) Schematic illustration of animal models in mice. (B, F) The activities ALT and AST were assayed by using semi-automated blood chemistry analyzer. (C, H) The expression of the myofibroblast marker  $\alpha$ -SMA and collagen was detected by Real-time PCR. (D, I) Protein levels in liver tissues were analyzed by Western blot analysis, (J) which were quantified using the ImageJ software. (E, K) Liver tissues were harvested 48 h after the final CCl<sub>4</sub> injection and stained with hematoxylin–eosin,

Masson, Sirius Red ( $\times 100$ ). (L) Liver fibrosis was observed by immunohistochemical staining of  $\alpha$ -SMA/COLIII-positive cells. Data represents the mean  $\pm$  SD from 6 to 8 separate experiments (significant as compared with vehicle-treated control,  $*p < 0.05$ ,  $**p < 0.01$ ;  $***p < 0.001$ ).

### **Fig. 2 Inhibitory effect of Asp on HSCs activation *in vitro***

(A-D) LX-2 cells were treated with Asp in different concentrations or at different time. (E, F) LX-2 cells were treated with 5 ng/mL TGF- $\beta$ 1 for 24 h and then treated with Asp for another 24 h. (A, B, E) Real-time PCR was assessed to investigate mRNA level of  $\alpha$ -SMA, COLIII, FN. (C, D, F) Western blot was assessed to investigate protein level of  $\alpha$ -SMA, COLIII, FN (n= 3). The results shown are mean  $\pm$  standard error of the mean.  $*p < 0.05$ ,  $**p < 0.01$ ,  $***p < 0.001$ .

### **Fig. 3 Gene expression profiling using RNA-seq**

(A) Scatter plots of all expressed genes. Statistics for upregulated and down-regulated genes among PBS vs Asp. (B) Hierarchical clustering of differentially expressed genes. (D) GO functional classification on DEGs for each pairwise. (E) Scatter plot of the top 20 KEGG enrichment results of DEGs in each pairwise comparison.

Differentially expressed genes were defined according to the combination of the absolute value of  $\log_2$ -Ratio  $\geq 1$  and FDR  $\leq 0.001$  The data are shown as the means  $\pm$  SD of three biological replicates.

### **Fig. 4 Effects of si-NLRP3 on inflammation and liver fibrosis in LX-2 cells**

LX-2 cells were transfected transiently with siRNA-NLRP3 for 48 h. (A) Real-time PCR analysis showed that the levels of NLRP3, IL-1 $\beta$ , IL-18,  $\alpha$ -SMA, COL1A1 and COL3A1 mRNA were significantly downregulated by NLRP3 silencing. (B) The protein expression levels of  $\alpha$ -SMA, FN, p-NF- $\kappa$ B, IL-1 $\beta$  decreased dramatically after LX-2 cells were induced to down-express NLRP3. (C, D) Expression of the above genes at the mRNA and protein levels in LX-2 cells, when LX-2 cells were transfected transiently with siRNA-ARRB2 for 48 h (n=3). The results shown are mean  $\pm$  standard error of the mean.  $*p < 0.05$ ,  $**p < 0.01$ .

**Fig. 5 Treatment with Asp blocked hepatic NF- $\kappa$ B/NLRP3 expression and attenuated fibrosis *in vitro* and *in vivo***

(A) LX-2 cells were stimulated with lipopolysaccharide (LPS) (1  $\mu$ g/mL or 2  $\mu$ g/mL) for 6 h, and then the cells were collected to assess  $\alpha$ -SMA, COLIII, FN, NLRP3, and IL-1 $\beta$  expression levels by western blot. (B) After 6 h of addition of 1  $\mu$ g/mL LPS, the medium was replaced with new medium in the presence or absence of Asp (15 mM) and the cells were incubated for an additional 24 h before harvesting. Protein levels were analyzed by Western blot analysis. (C-E) LX-2 cells were treated with Aspartate in different concentrations or at different time. (C, D) Real-time PCR was assessed to investigate mRNA level of NLRP3, p-NF- $\kappa$ B, IL-1 $\beta$ . (E, F) Western blot was assessed to investigate protein level of NLRP3, p-NF- $\kappa$ B, IL-1 $\beta$  (n= 3). (G- J) The expression of the inflammation marker NLRP3, p-NF- $\kappa$ B, IL-1 $\beta$  was detected by Real-time PCR (G), Western blot (H), and immunohistochemistry (J), n=5. The results shown are mean  $\pm$  standard error of the mean. \* $p$ <0.05, \*\* $p$ <0.01, \*\*\* $p$ <0.001.

**Fig. 6 Asp inhibited liver fibrosis by upregulating NS3TP1 expression and then inhibiting the NF- $\kappa$ B/ NLRP3 signaling pathway**

(A-E) The expression of NS3TP1 was detected by Real-time PCR. (F-I) LX-2 cells were transfected transiently with pcDNA 3.1/myc-His(-)-NS3TP1 plasmid or siRNA-NS3TP1 for 48 h. Real-time PCR (F, G) and western blot (H, I) analysis of the mRNA and protein levels of genes about NF- $\kappa$ B signaling pathways and liver fibrosis in LX-2 cells, respectively, which were quantified using the ImageJ software, n=3. The results shown are mean  $\pm$  standard error of the mean. \* $p$  <0.05, \*\* $p$ < 0.01, \*\*\* $p$ <0.001.

**Fig. 7 Asp supplementation suppressed HSC proliferation and activation and promoted apoptosis *in vitro***

(A, B) The proliferation ability of the cells were measured with CCK8 kit in LX-2 cells and primary HSCs. (C, D) The apoptosis rates of the cells were measured using Annexin V-FITC/7-AAD by flow cytometry. (E, F) Fat droplets in the LX-2 cells

were detected by Oil Red O staining. (n = 3). The results shown are mean  $\pm$  standard error of the mean. \* $p < 0.05$ , \*\* $p < 0.01$ , \*\*\* $p < 0.001$ .

**Fig. 8 D-Asp had effects similar to those of L-Asp**

(A, B) LX-2 cells were treated with D-Asp in different concentrations or at different time, and Western blot analysis of the protein levels of genes about NF- $\kappa$ B signaling pathways and liver fibrosis. (C) Schematic image. Asp prevents liver fibrogenesis by inhibiting HSC activation through inhibiting NF- $\kappa$ B/NLRP3 signaling pathway via upregulating NS3TP1.

Fig. 1A-L

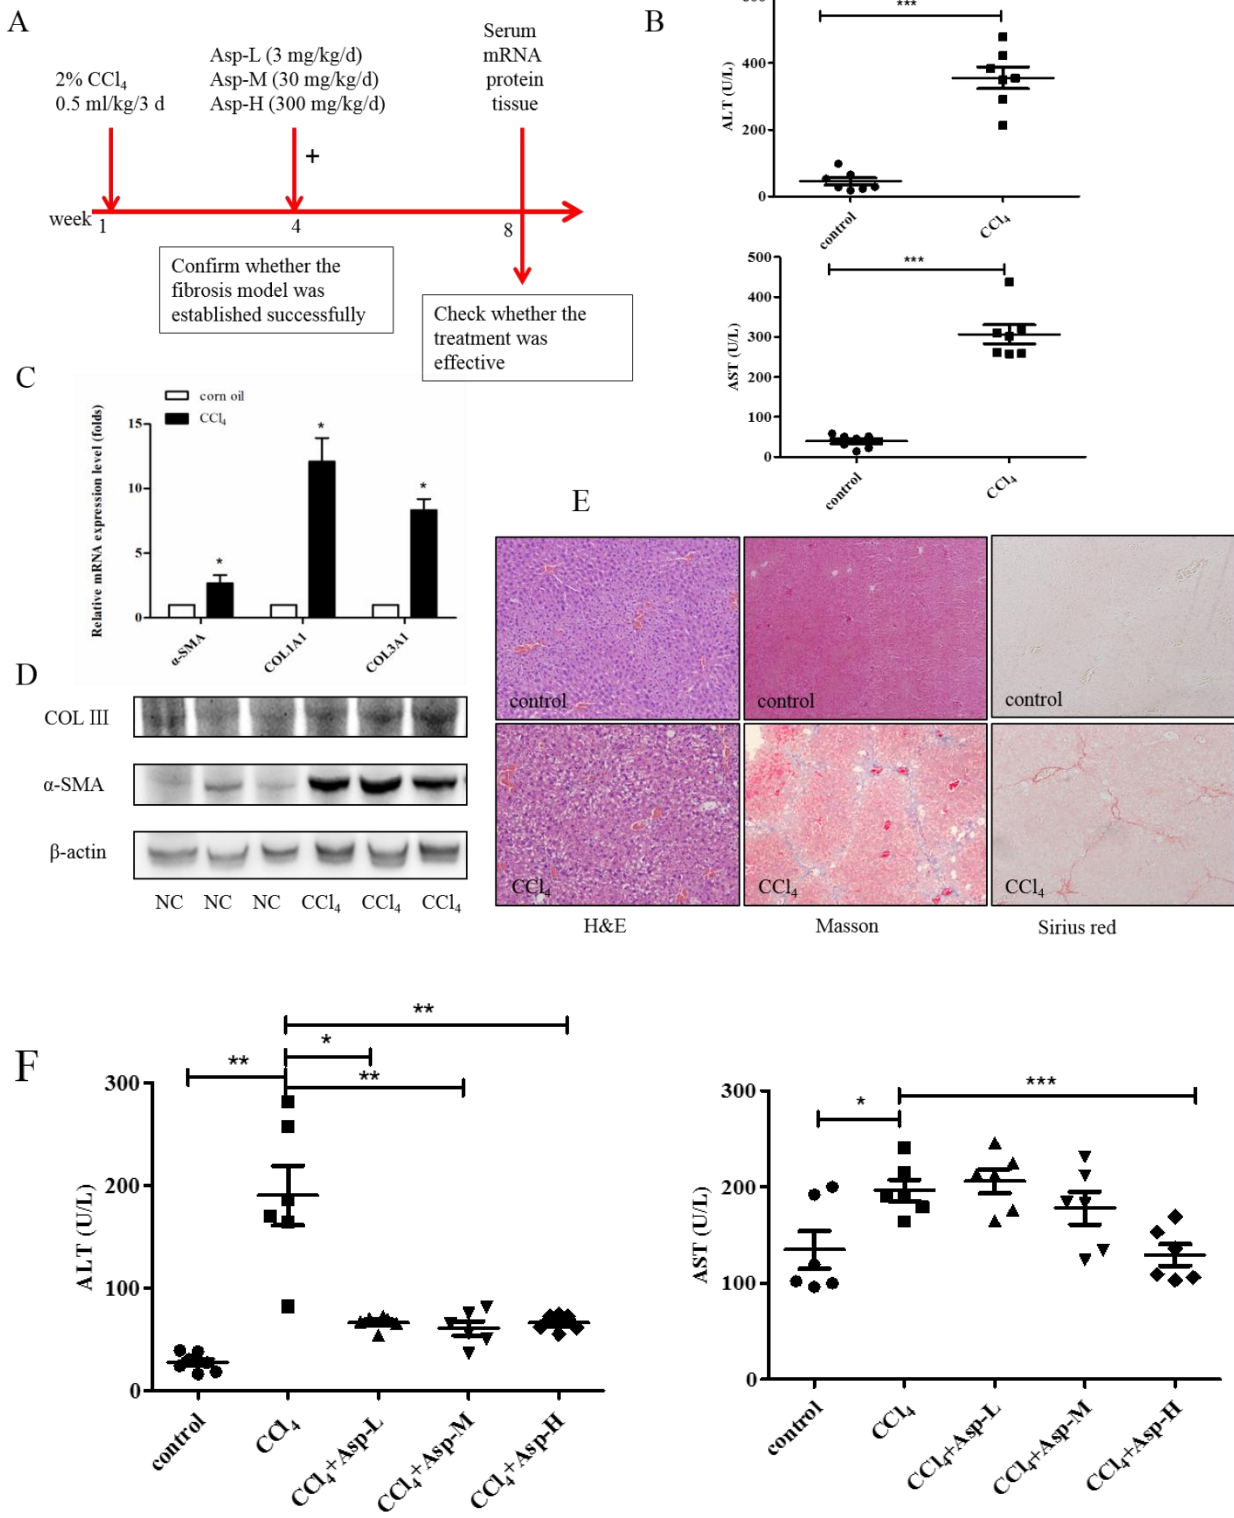

G

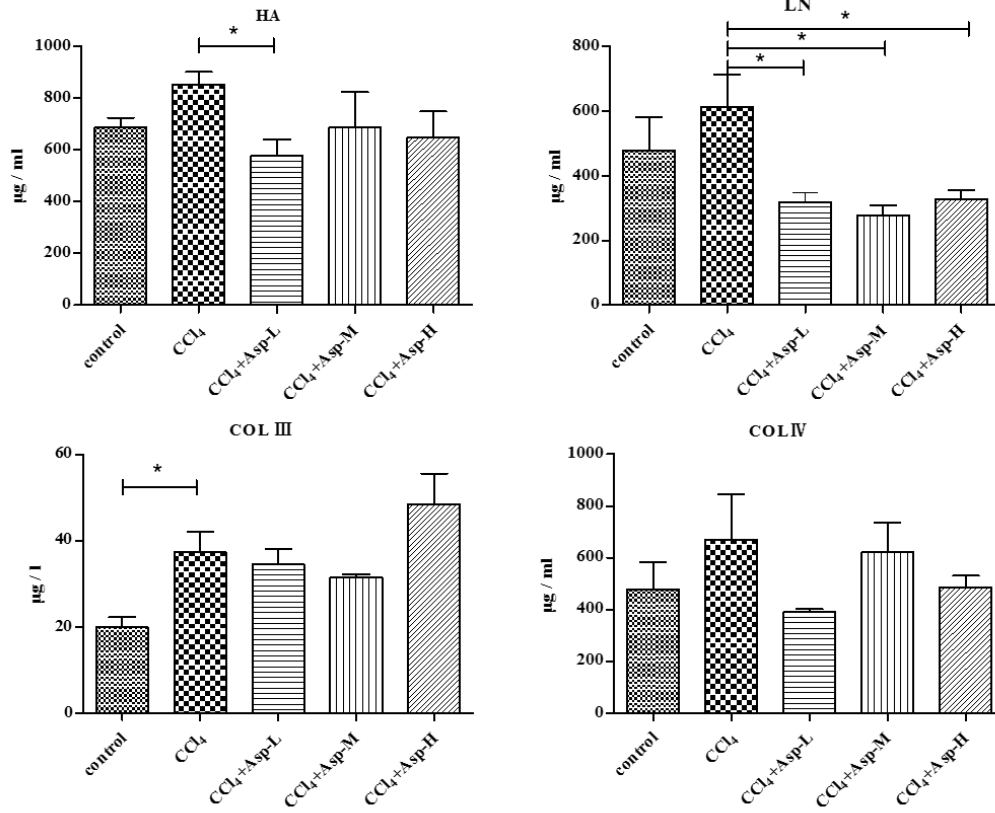

H

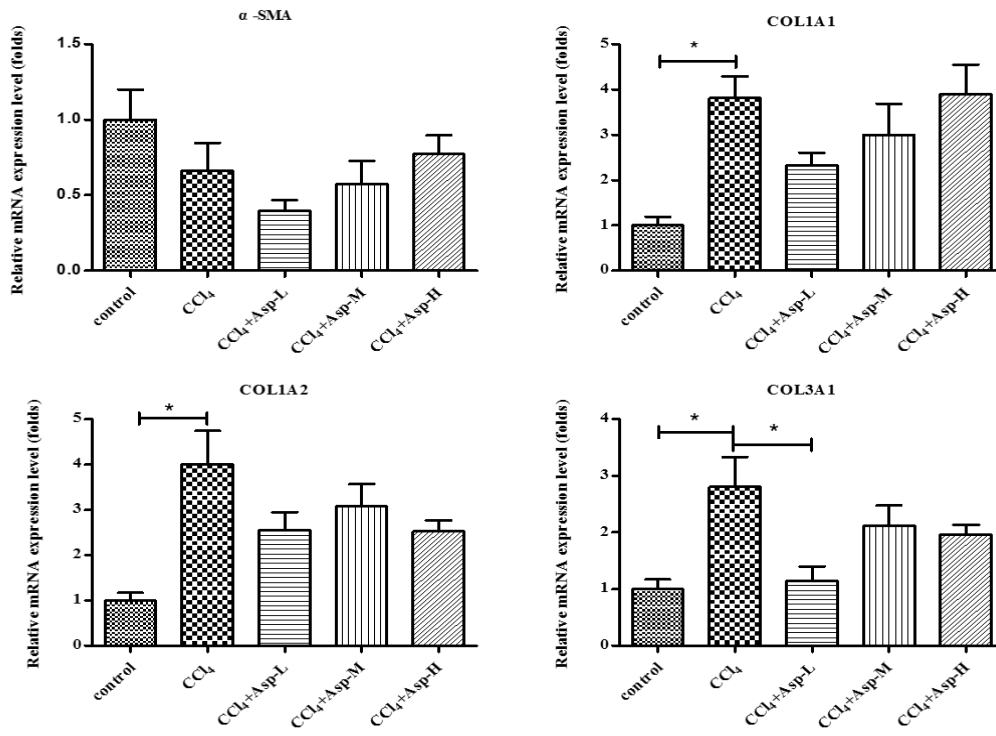



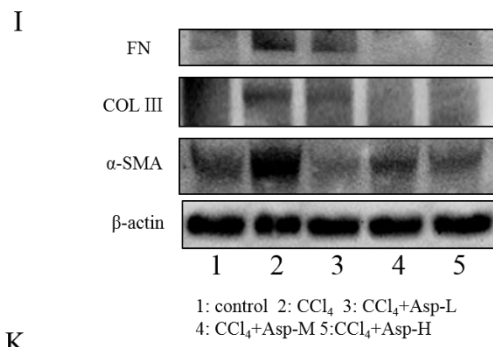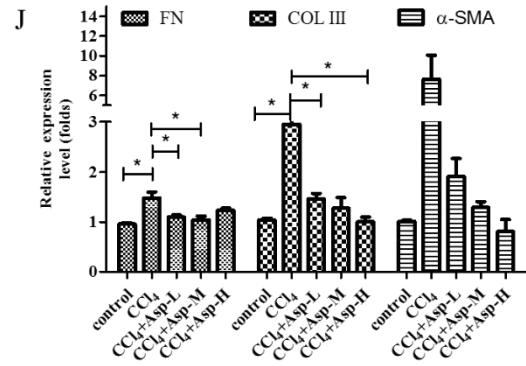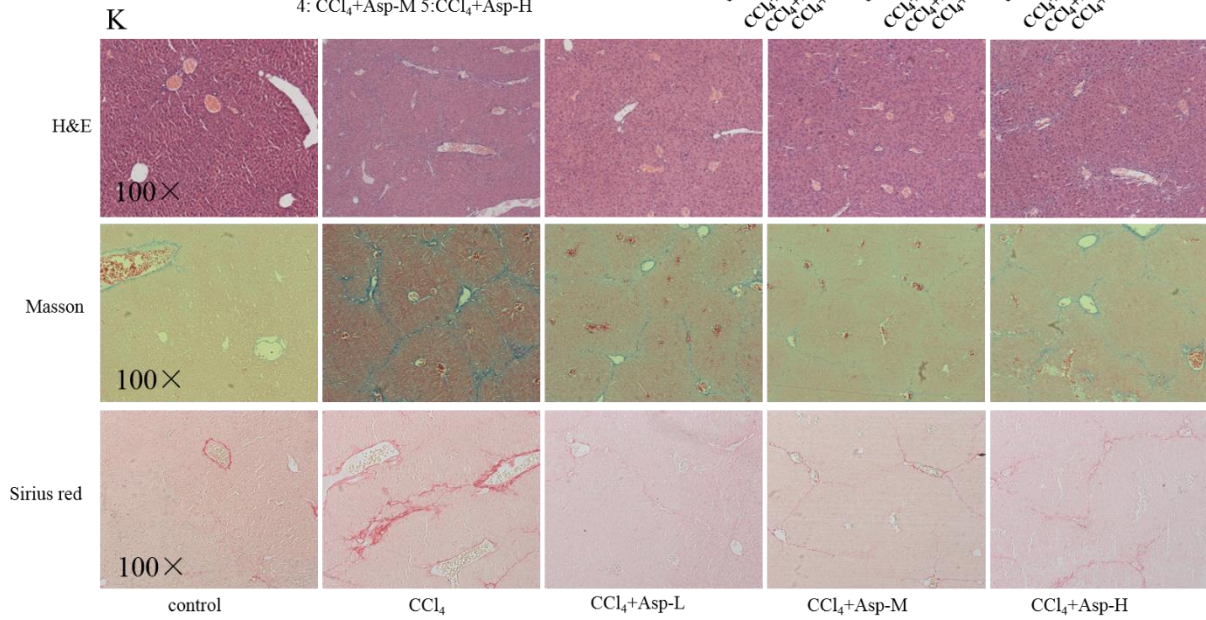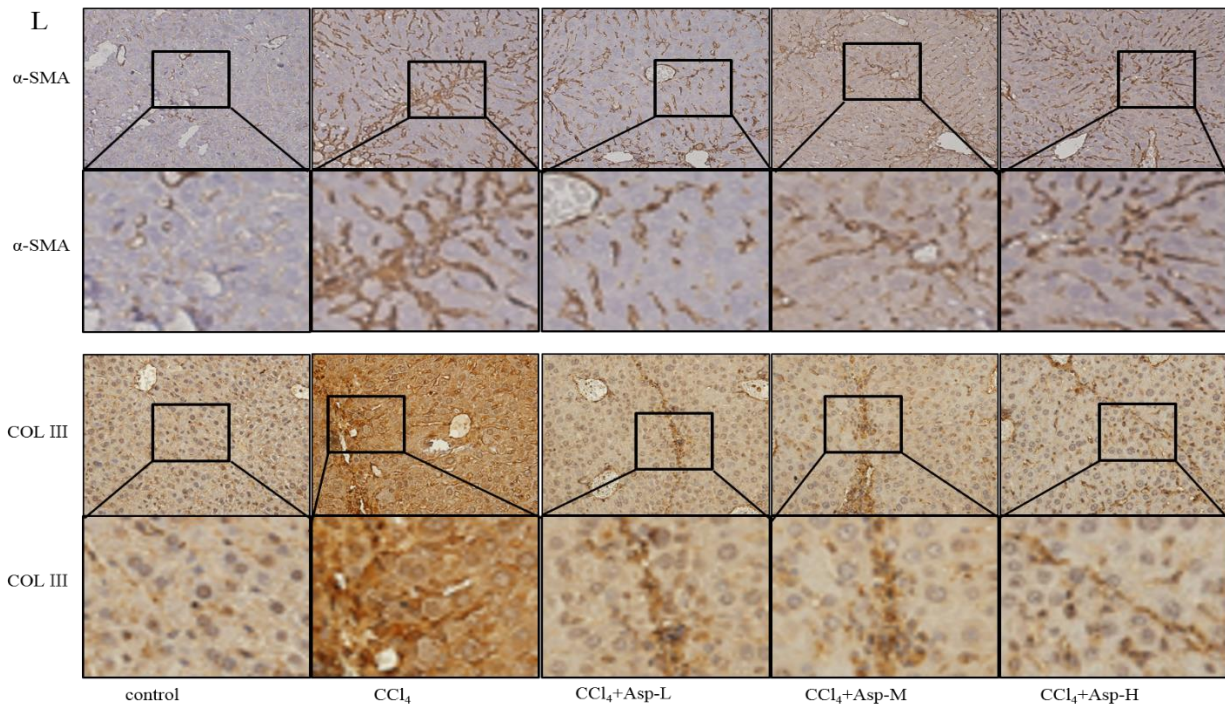

Fig. 2A-F

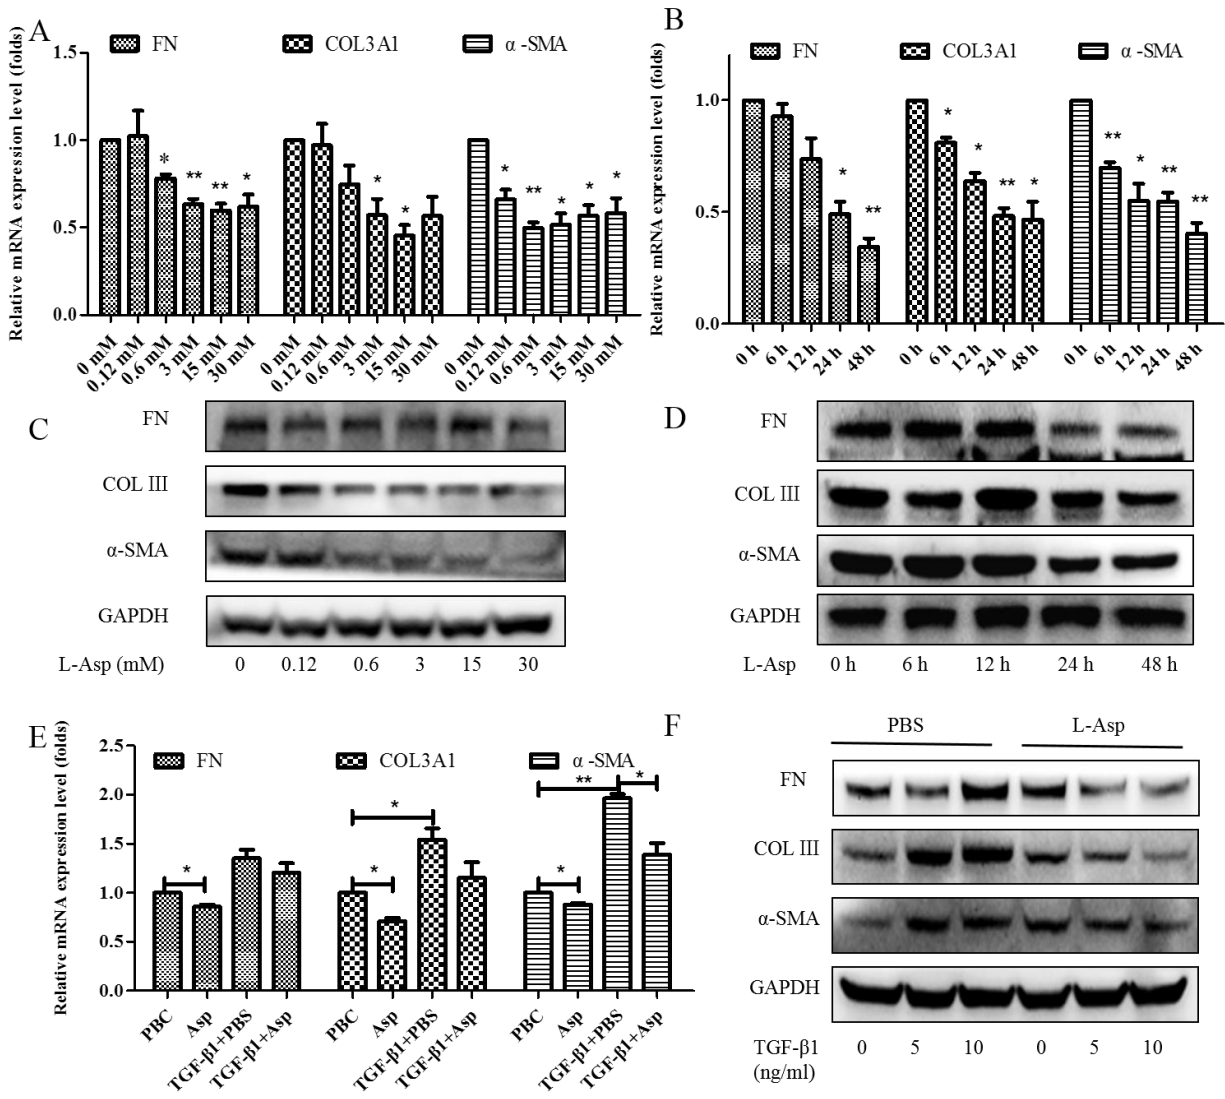

Fig. 3A-D

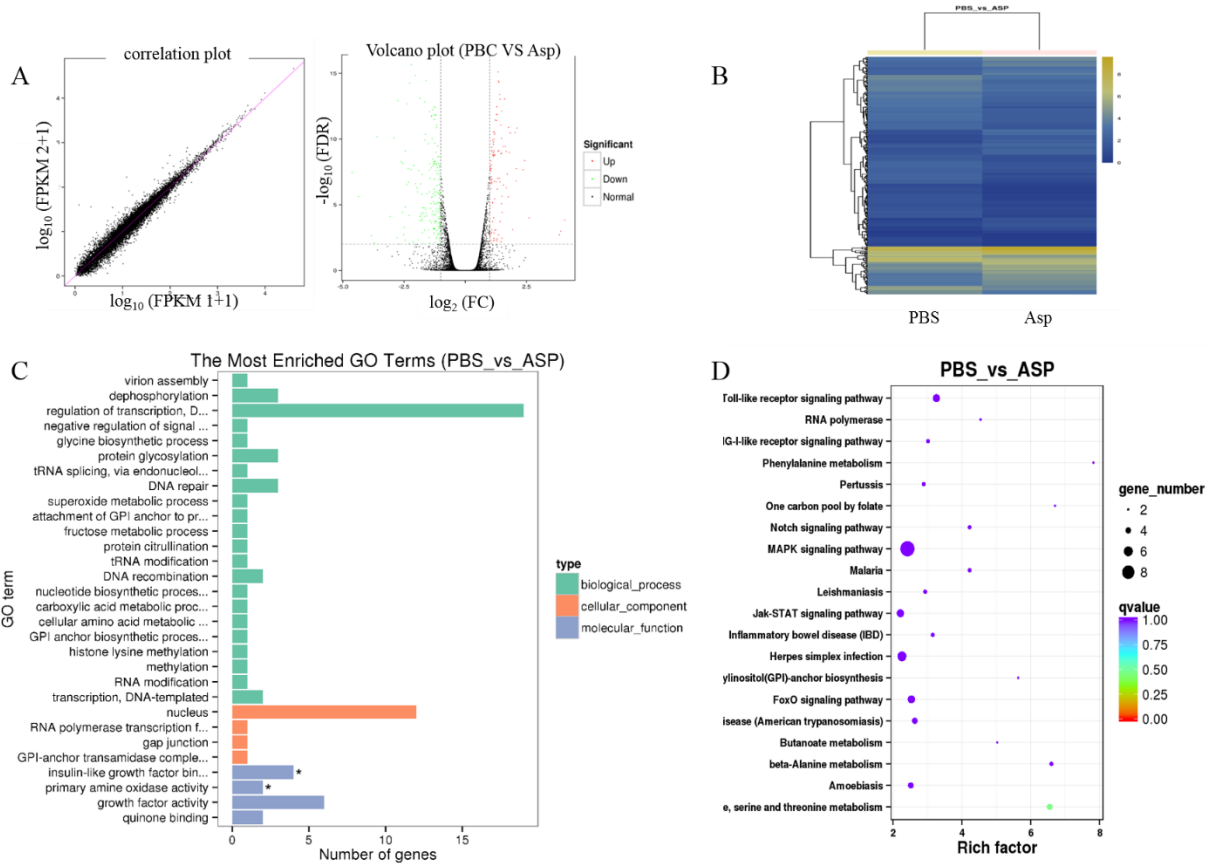

Fig. 4A-D

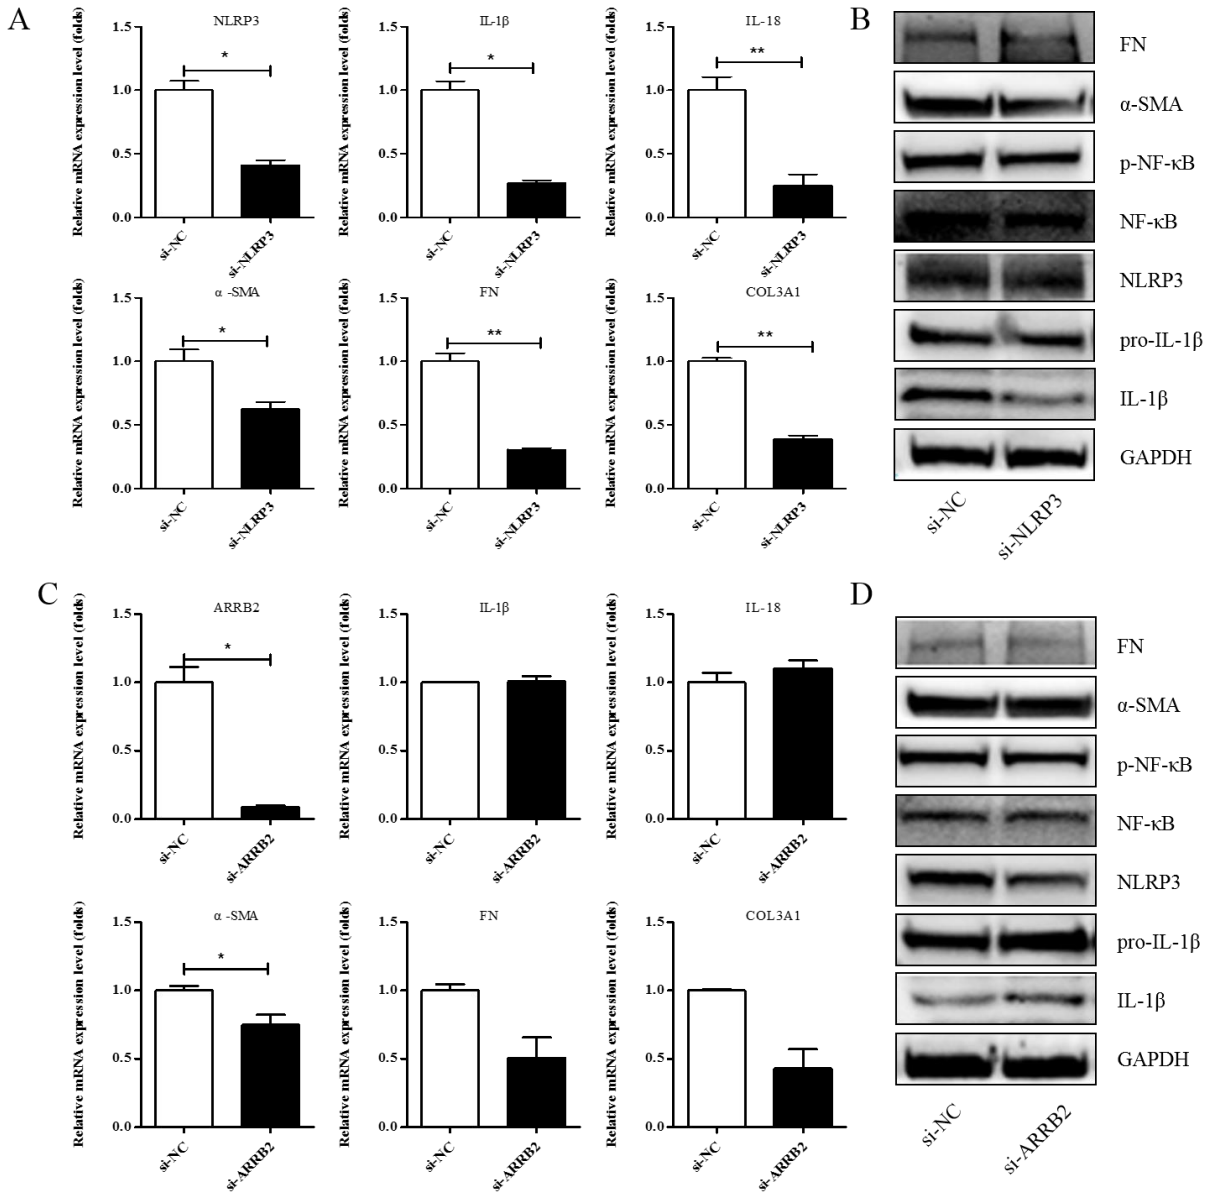

Fig. 5A-J

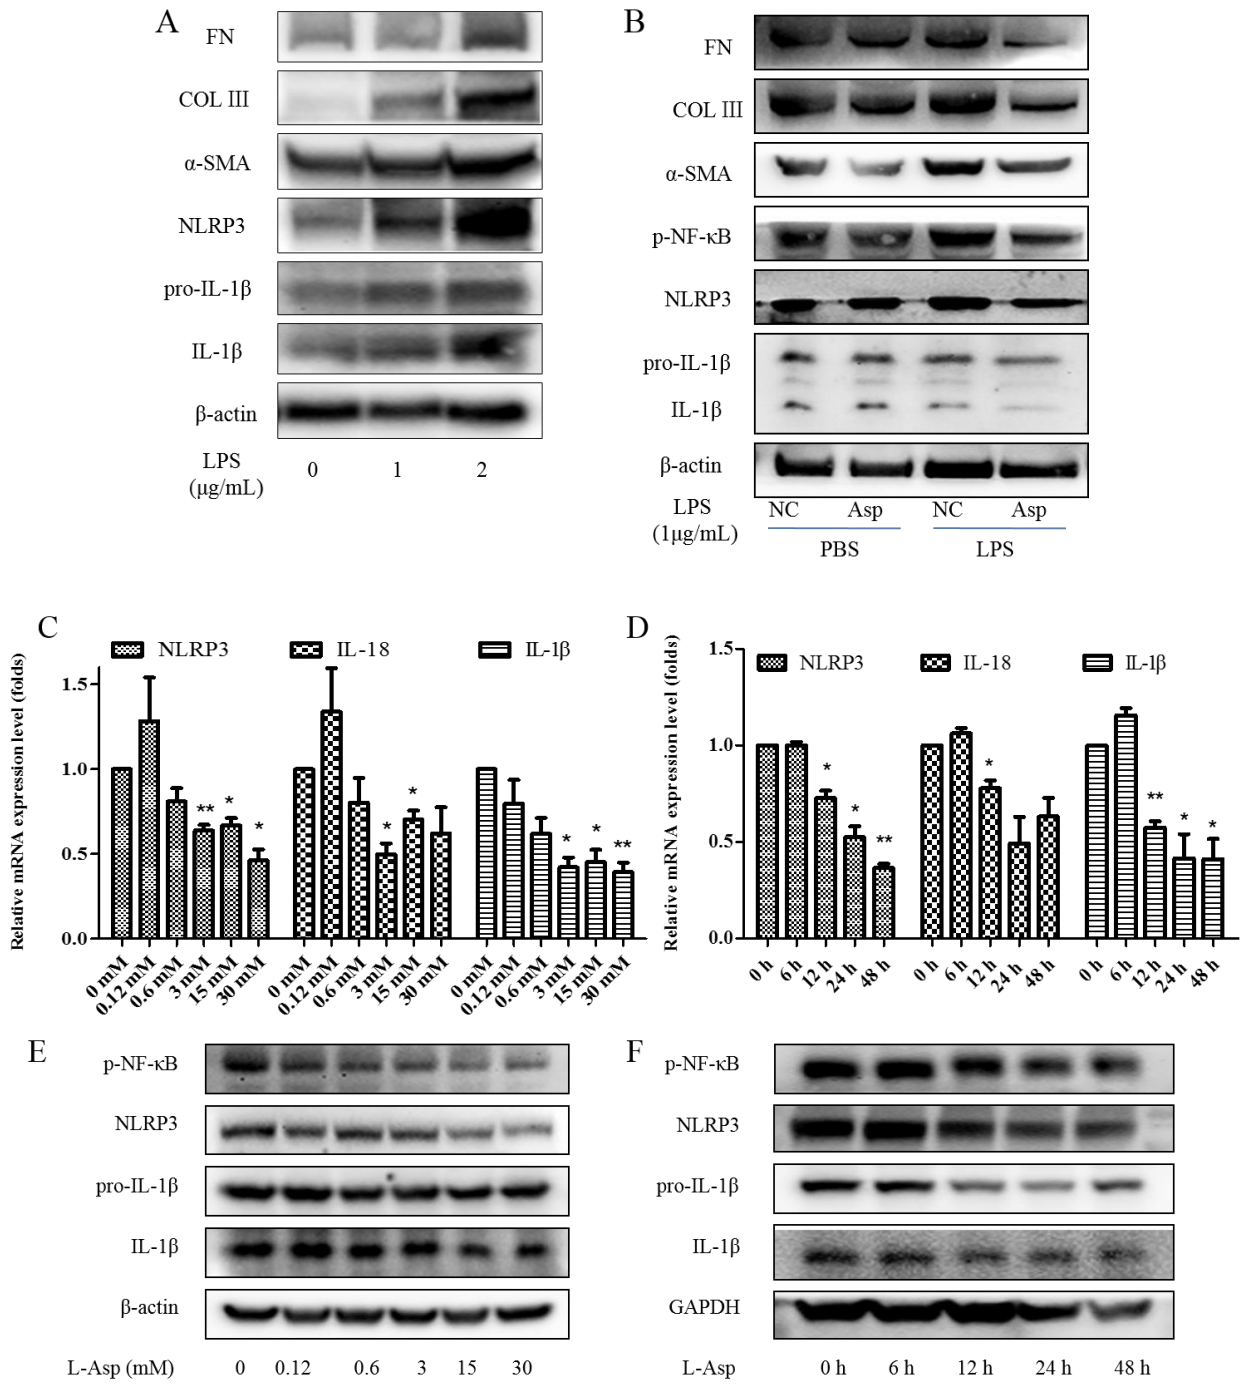

G

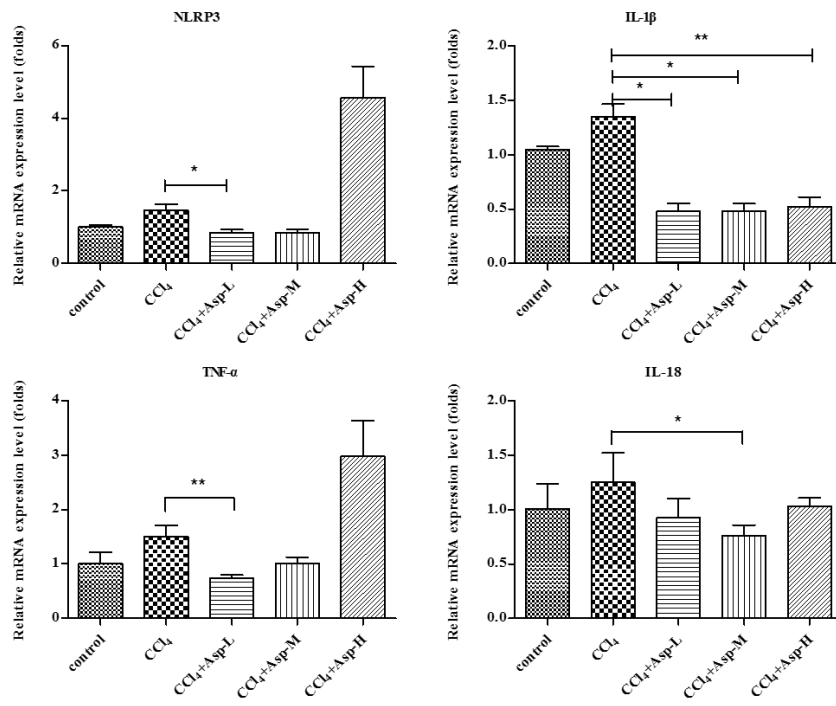

H

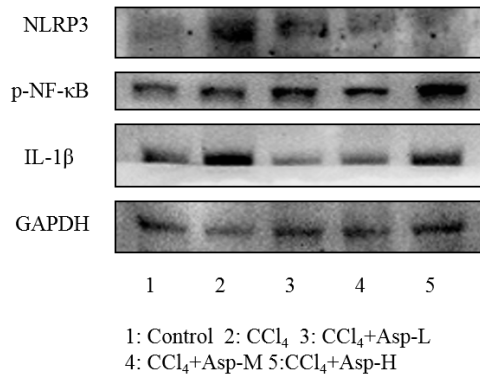

I

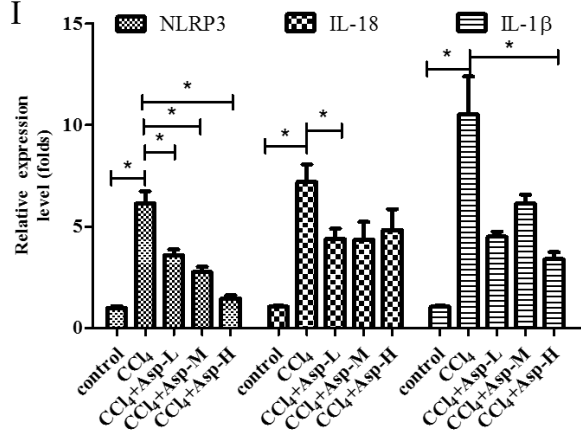

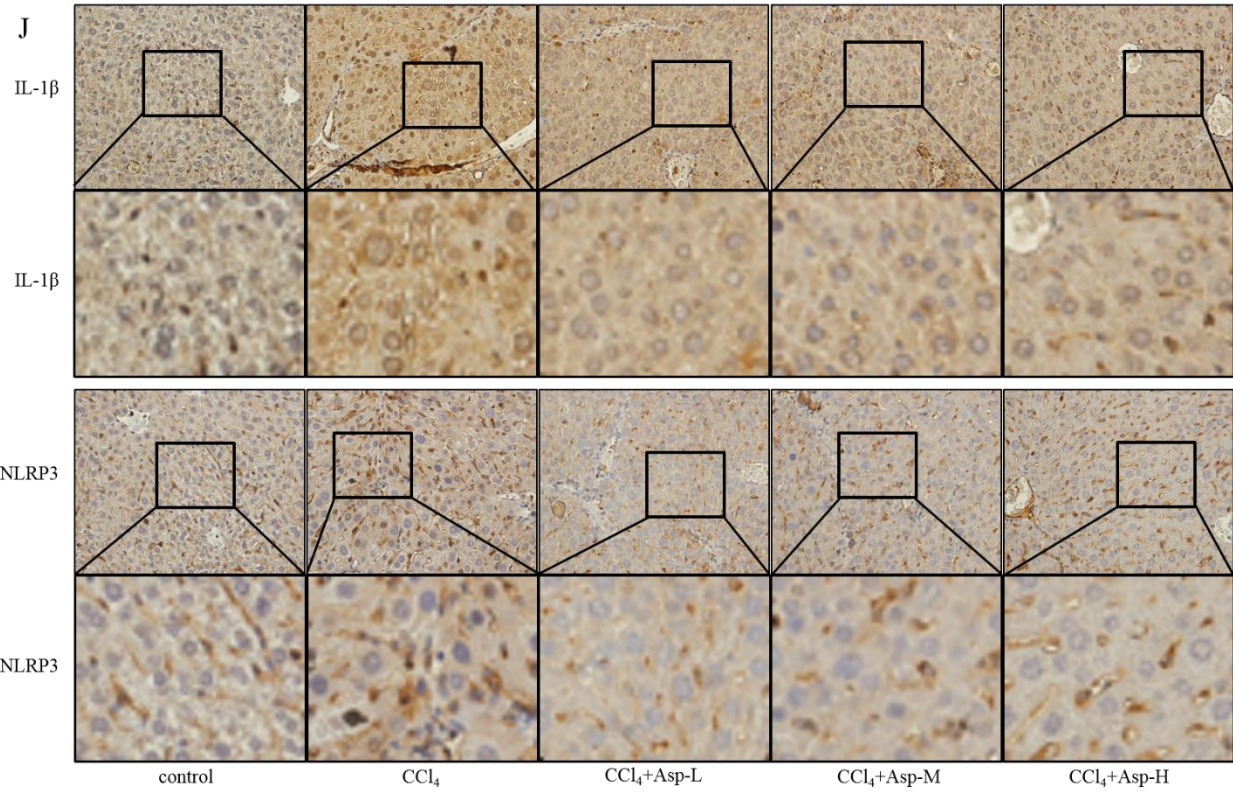

Fig. 6A-I

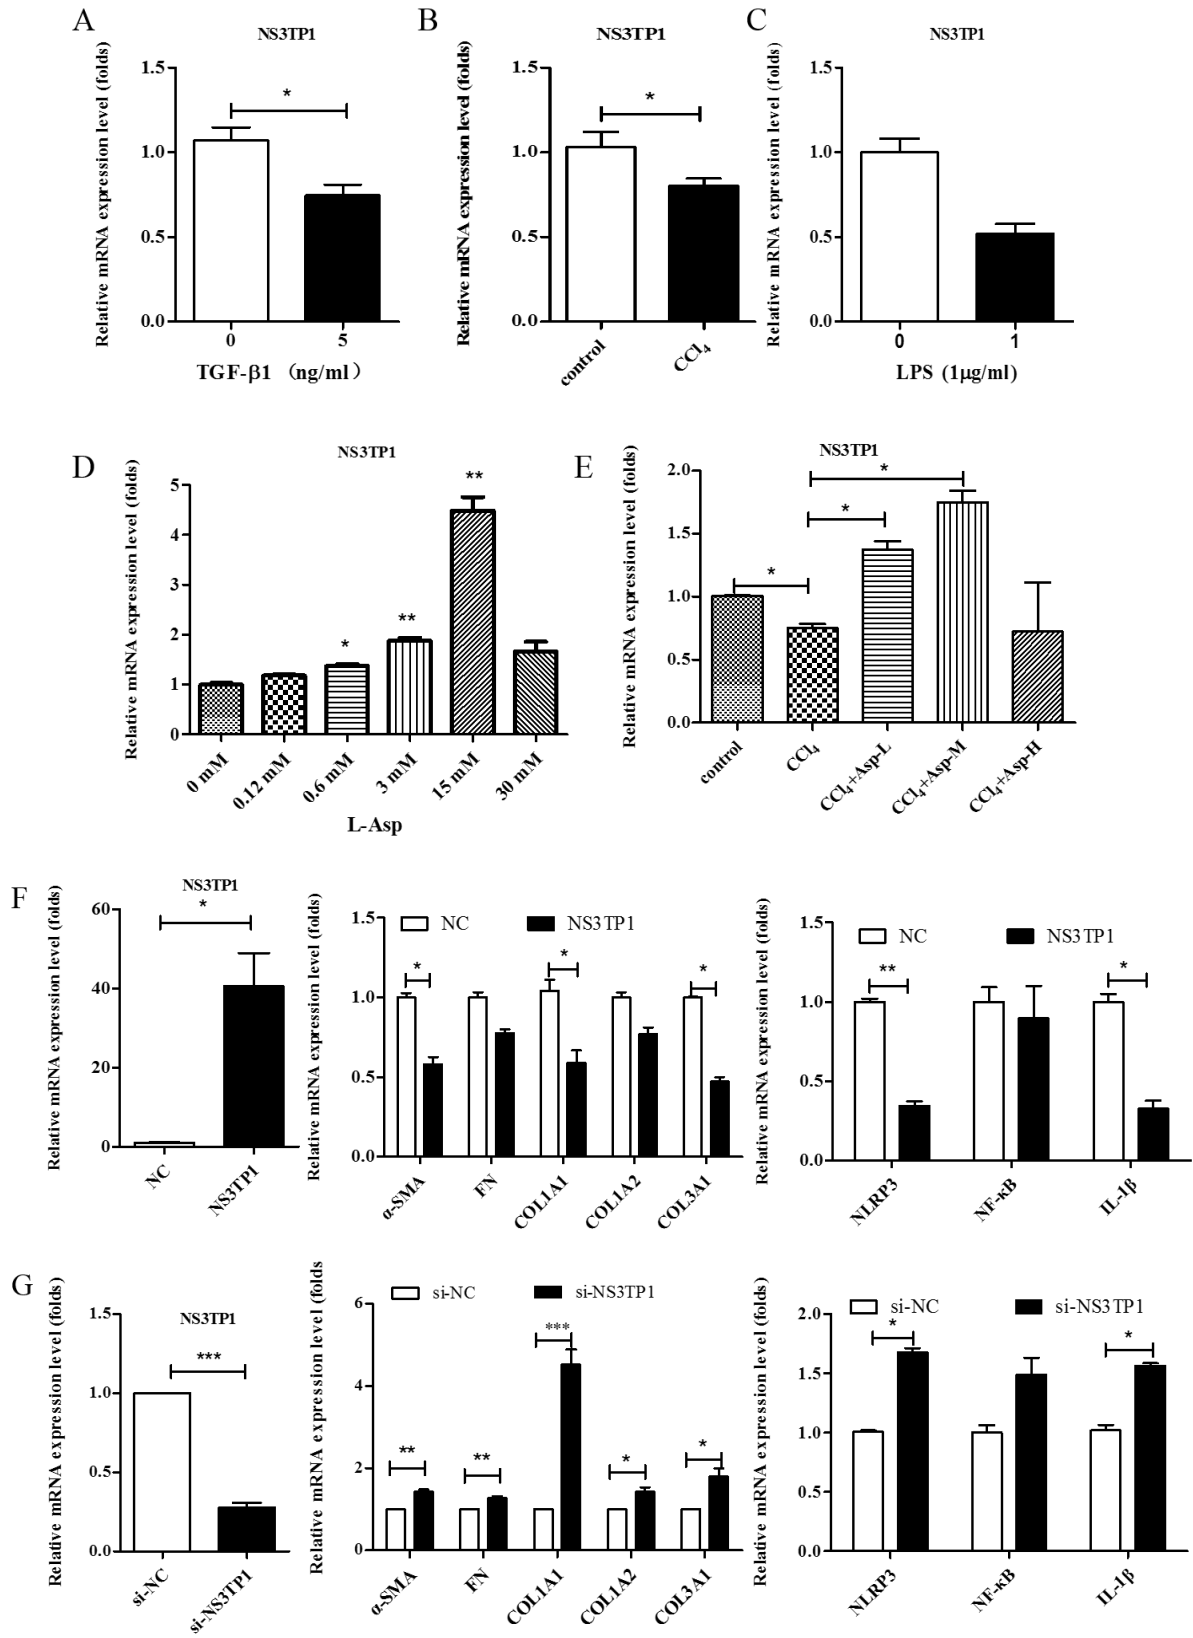



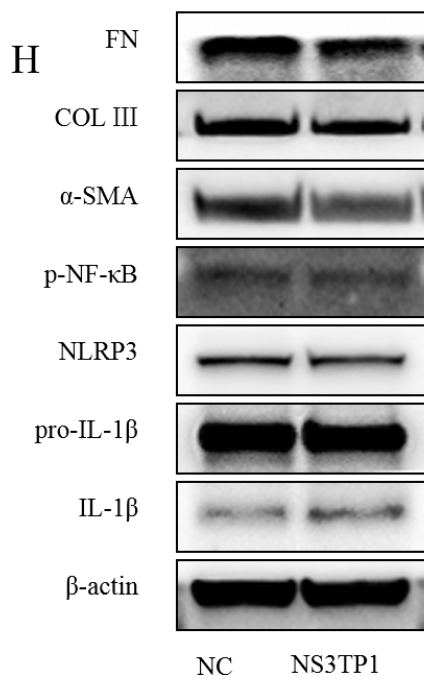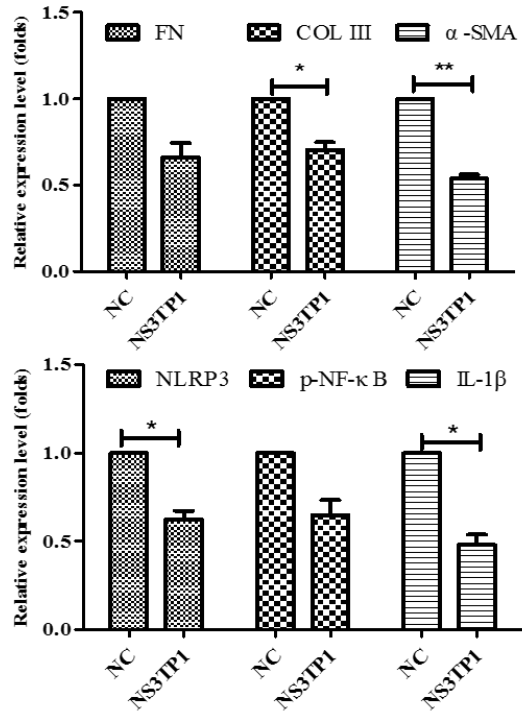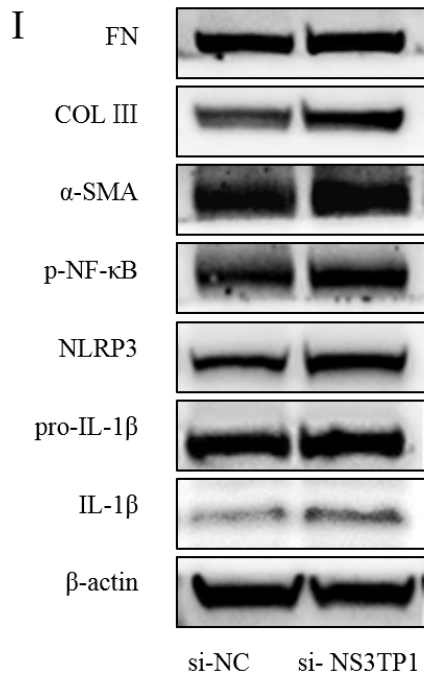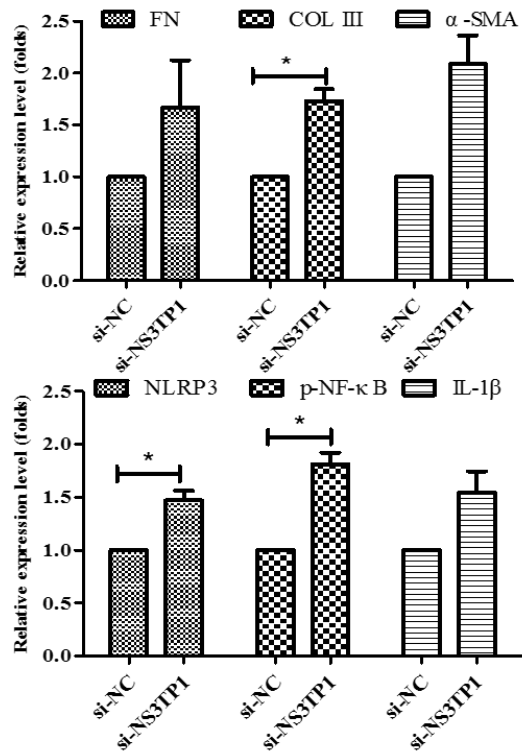

Fig. 7A-F

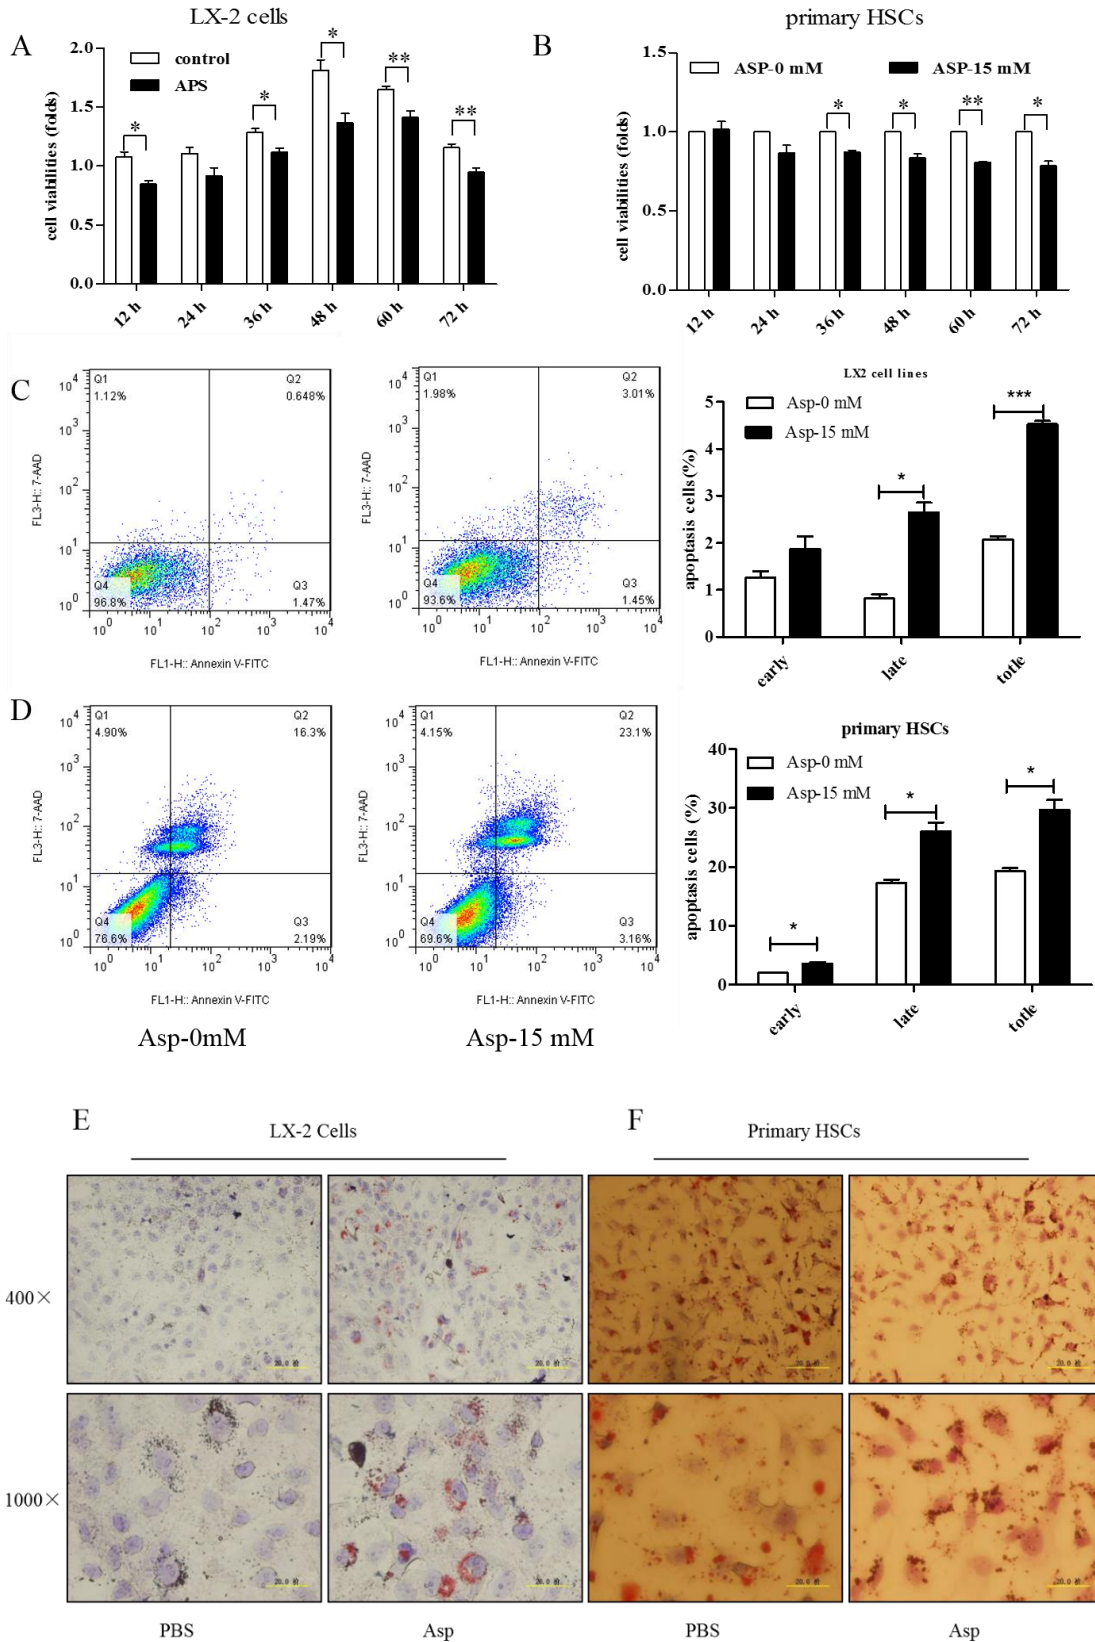

Fig. 8A-C

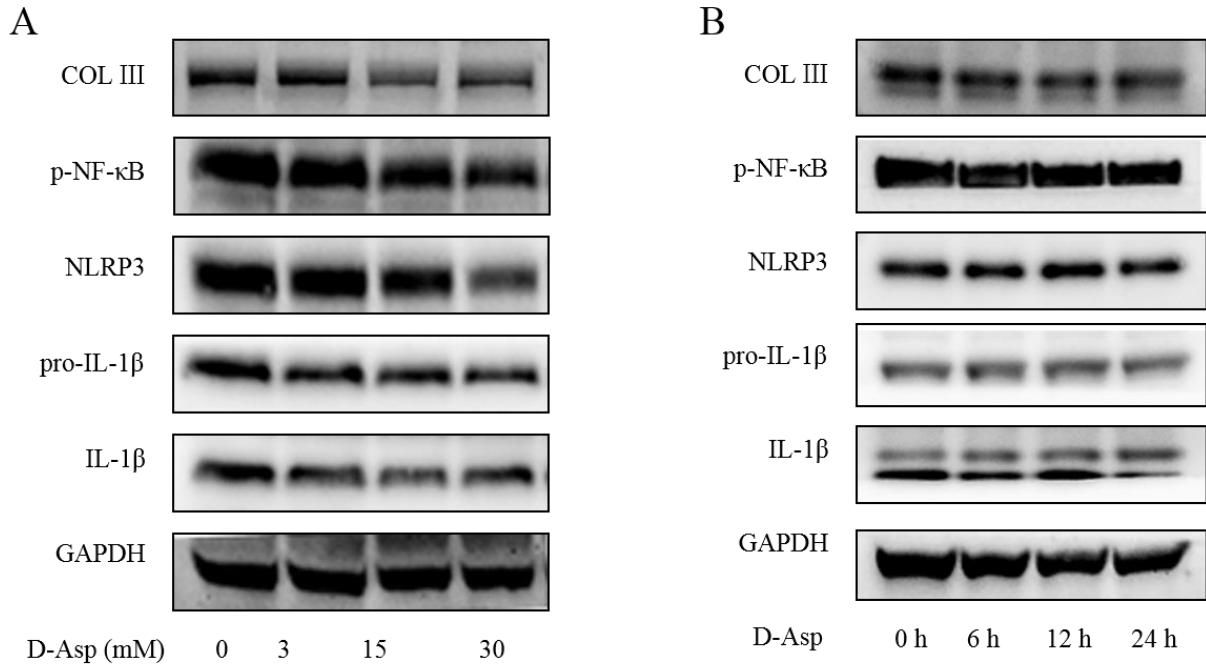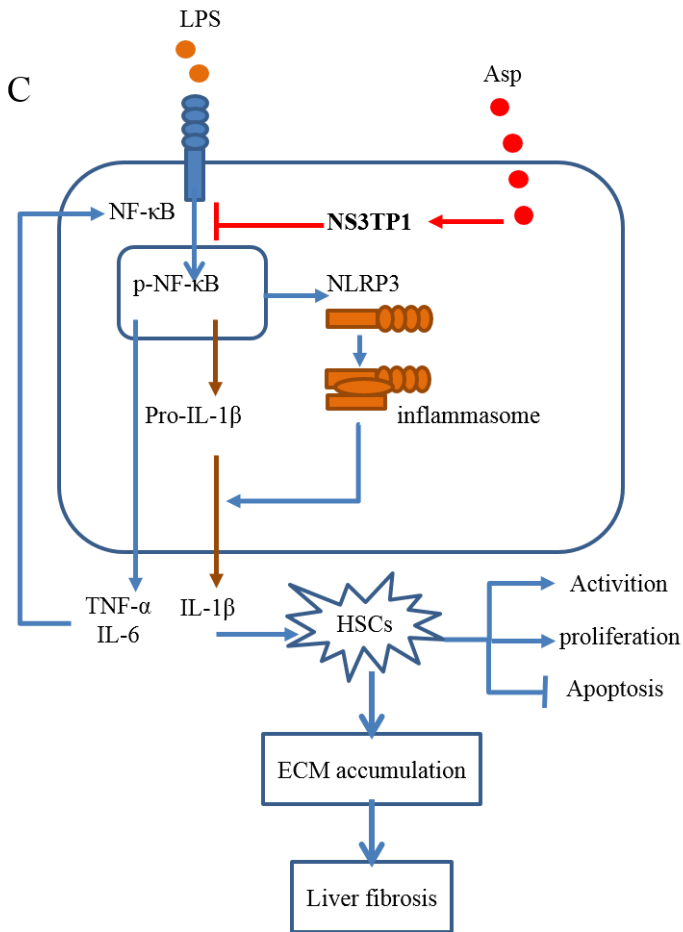

Source: http://biorxiv.org/content/10.1101/2022.06.27.497857v1.full.pdf
